# Supplementary material
Source: PubMed Central journal article supplement (PMC5096379)
Supplement: NIHMS826006-supplement-supplementary_material.pdf [file NIHMS826006-supplement-supplementary_material.pdf]

---- SUPPORTING INFORMATION ----

**Facile Smiles-Type Rearrangement in Radical Cations of *N*-Acyl Arysulfonamides and  
Analogues**

Karl K. Irikura and Nino Todua

*National Institute of Standards and Technology, Gaithersburg, MD 20899-8320, United States*

CONTENTS

|                                                                                                      |     |
|------------------------------------------------------------------------------------------------------|-----|
| EIMS of normal and <sup>18</sup> O-labeled <i>p</i> -acetamidophenyl-SO <sub>2</sub> -NH-CO-Ph ..... | S2  |
| Structures for species in Figure 1a.....                                                             | S3  |
| Structures for species in Figure 1b.....                                                             | S12 |
| Data plotted in Figure 3 (Hammett plot).....                                                         | S21 |
| Structures supporting Figure 3 (Hammett plot) .....                                                  | S22 |
| Structures supporting Table 1 .....                                                                  | S41 |

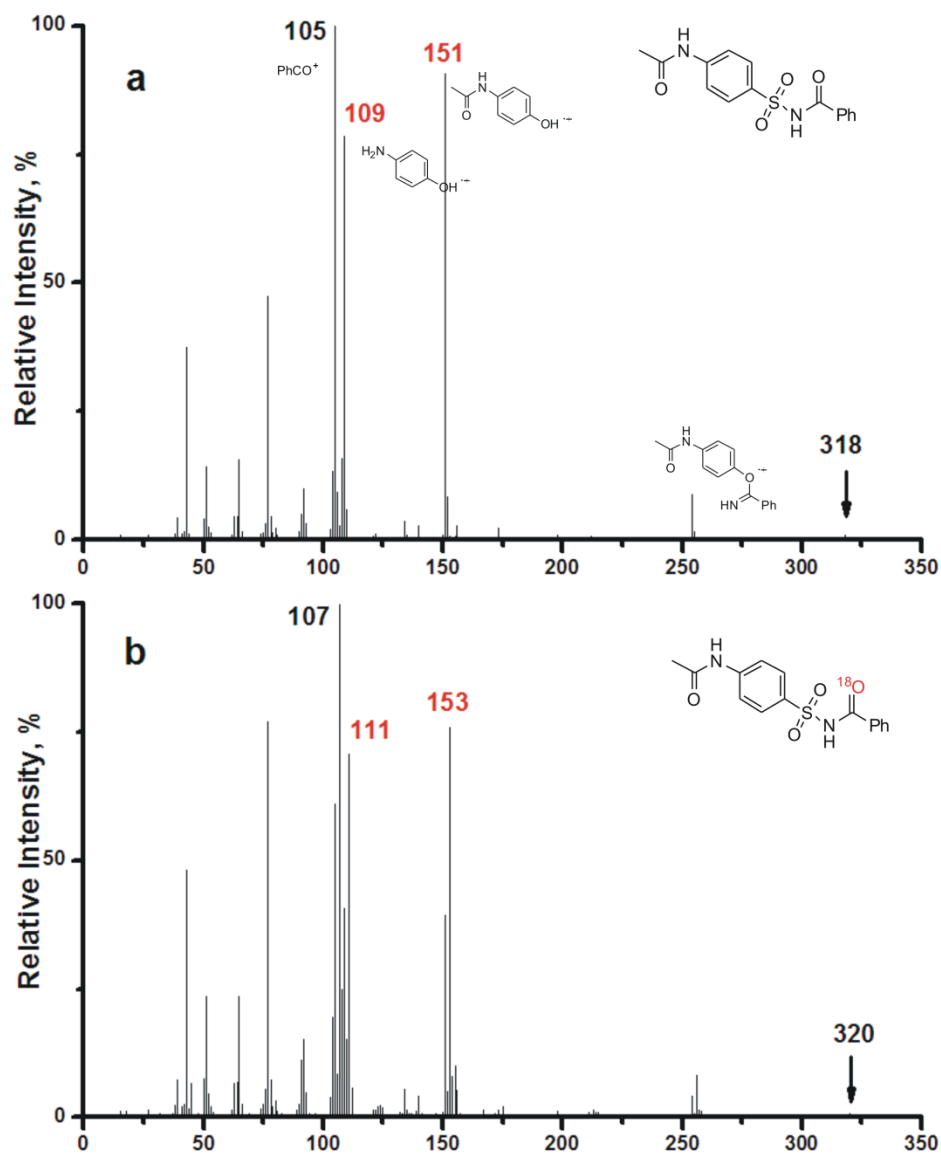

EIMS of pair of isotopologues (70% <sup>18</sup>O enrichment in b). The oxygen atom in the major peaks is from the benzoyl group, not the sulfonyl group.

### B3LYP/6-31G(d) structures and electronic energies for species in Figure 1a

**1a** radical cation

E = -1235.644874

$\langle S^2 \rangle = 0.765$

|   |           |           |           |
|---|-----------|-----------|-----------|
| C | -2.924811 | -1.736468 | -0.260066 |
| C | -4.245604 | -2.156003 | -0.146694 |
| C | -5.251069 | -1.228022 | 0.140576  |
| C | -4.937260 | 0.124300  | 0.310434  |
| C | -3.617105 | 0.551091  | 0.204363  |
| C | -2.601390 | -0.381062 | -0.071146 |
| H | -2.132278 | -2.440991 | -0.488040 |
| H | -4.494244 | -3.203708 | -0.284069 |
| H | -6.282668 | -1.556604 | 0.225189  |
| H | -5.722297 | 0.844863  | 0.516959  |
| H | -3.395260 | 1.610691  | 0.296771  |
| C | -1.182889 | 0.008579  | -0.210123 |
| O | -0.349912 | -0.672034 | -0.817210 |
| N | -0.762098 | 1.178298  | 0.403952  |
| S | 0.722604  | 1.910763  | -0.023479 |
| O | 1.021207  | 2.795213  | 1.095905  |
| O | 0.693250  | 2.371485  | -1.402533 |
| C | 1.828702  | 0.484047  | 0.029789  |
| C | 2.105869  | -0.134664 | 1.270544  |
| C | 2.533422  | 0.134822  | -1.147278 |
| C | 3.053059  | -1.125784 | 1.332605  |
| H | 1.579015  | 0.180538  | 2.164960  |
| C | 3.486713  | -0.848787 | -1.096308 |
| H | 2.297815  | 0.646548  | -2.073612 |
| C | 3.764379  | -1.505092 | 0.145857  |
| H | 3.283139  | -1.616800 | 2.273588  |
| H | 4.034455  | -1.137706 | -1.988386 |
| N | 4.692893  | -2.467417 | 0.203866  |
| H | 5.214940  | -2.751611 | -0.617831 |
| H | 4.913515  | -2.944017 | 1.071244  |
| H | -1.361807 | 1.741376  | 0.999551  |

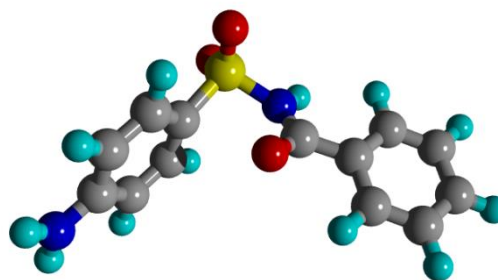

Smiles transition structure from **1a** (radical cation)

E = -1235.621669

$\langle S^2 \rangle = 0.759$

|   |           |           |           |
|---|-----------|-----------|-----------|
| C | -2.735978 | -1.646195 | -0.000354 |
| C | -4.020150 | -2.176538 | -0.022164 |
| C | -5.129597 | -1.325351 | -0.007670 |
| C | -4.960408 | 0.063463  | 0.032349  |
| C | -3.682312 | 0.605818  | 0.049362  |
| C | -2.560824 | -0.248174 | 0.026746  |
| H | -1.869253 | -2.297356 | -0.015166 |
| H | -4.158696 | -3.252421 | -0.050923 |
| H | -6.131246 | -1.744410 | -0.021656 |
| H | -5.825126 | 0.718393  | 0.059260  |
| H | -3.564553 | 1.683725  | 0.116746  |
| C | -1.213733 | 0.293438  | 0.034344  |
| O | -0.220279 | -0.507653 | 0.336390  |
| N | -0.899362 | 1.548521  | -0.247184 |
| S | 0.852010  | 1.900913  | -0.065368 |
| O | 1.028782  | 2.589748  | 1.204754  |
| O | 1.288061  | 2.463984  | -1.334603 |
| C | 1.235620  | -0.028345 | 0.099787  |
| C | 2.025598  | -0.278900 | 1.298979  |
| C | 1.751516  | -0.564299 | -1.152643 |
| C | 3.224977  | -0.925189 | 1.223207  |
| H | 1.650445  | 0.091647  | 2.246127  |
| C | 2.952984  | -1.213884 | -1.194787 |
| H | 1.176956  | -0.410651 | -2.059795 |
| C | 3.734663  | -1.409049 | -0.018991 |
| H | 3.803186  | -1.078291 | 2.130350  |
| H | 3.320791  | -1.588202 | -2.146252 |
| N | 4.928524  | -2.046107 | -0.076463 |
| H | 5.313046  | -2.369285 | -0.953138 |
| H | 5.501745  | -2.167736 | 0.746670  |
| H | -1.560225 | 2.233680  | -0.602118 |

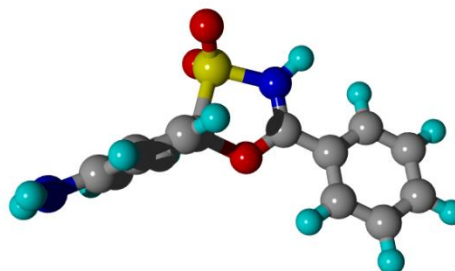

**3a...SO<sub>2</sub> complex (radical cation)**

E = -1235.674857

$\langle S^2 \rangle = 0.760$

|   |           |           |           |
|---|-----------|-----------|-----------|
| C | 3.256369  | -1.325806 | 0.027615  |
| C | 4.623372  | -1.585696 | 0.079548  |
| C | 5.536962  | -0.530507 | 0.118791  |
| C | 5.082147  | 0.791297  | 0.104526  |
| C | 3.718205  | 1.057373  | 0.058750  |
| C | 2.791375  | 0.000236  | 0.024874  |
| H | 2.550726  | -2.148283 | -0.004391 |
| H | 4.975537  | -2.612536 | 0.087840  |
| H | 6.602603  | -0.736091 | 0.154570  |
| H | 5.790971  | 1.613207  | 0.121289  |
| H | 3.379400  | 2.089127  | 0.021974  |
| C | 1.349487  | 0.300207  | 0.008682  |
| O | 0.604531  | -0.793390 | -0.464851 |
| N | 0.712977  | 1.362188  | 0.292766  |
| S | -1.940029 | 2.593692  | -0.437241 |
| O | -2.431261 | 2.522542  | 0.941592  |
| O | -2.305164 | 1.495001  | -1.339688 |
| C | -0.681309 | -1.007776 | -0.149620 |
| C | -1.413387 | -1.763720 | -1.105772 |
| C | -1.286947 | -0.600579 | 1.070148  |
| C | -2.733912 | -2.046160 | -0.890919 |
| H | -0.907750 | -2.075484 | -2.012984 |
| C | -2.607658 | -0.885931 | 1.290879  |
| H | -0.715466 | -0.051406 | 1.805256  |
| C | -3.371360 | -1.592721 | 0.308430  |
| H | -3.309170 | -2.596173 | -1.629572 |
| H | -3.087257 | -0.565832 | 2.210692  |
| N | -4.672763 | -1.837750 | 0.515879  |
| H | -5.148179 | -1.507734 | 1.347782  |
| H | -5.237293 | -2.326827 | -0.168890 |
| H | 1.339943  | 2.093359  | 0.629749  |

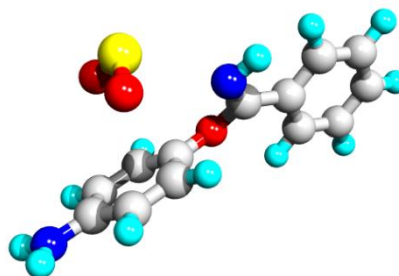

**3a radical cation**

E = -687.078595

$\langle S^2 \rangle = 0.759$

|   |           |           |           |
|---|-----------|-----------|-----------|
| C | 3.384016  | 1.063178  | 0.320572  |
| C | 2.297589  | 0.240485  | -0.024422 |
| C | 2.527258  | -1.111493 | -0.330427 |
| C | 3.822763  | -1.622084 | -0.307552 |
| C | 4.896990  | -0.797522 | 0.032017  |
| C | 4.674529  | 0.545260  | 0.349849  |
| C | 0.944751  | 0.830791  | -0.083805 |
| O | -0.026888 | -0.188130 | 0.039868  |
| C | -1.356608 | -0.074753 | 0.022959  |
| C | -2.116444 | 1.118976  | -0.148407 |
| C | -3.486617 | 1.045461  | -0.140681 |
| C | -4.159782 | -0.203975 | 0.037996  |
| C | -3.387346 | -1.396856 | 0.210922  |
| C | -2.023012 | -1.326198 | 0.202008  |
| N | -5.500015 | -0.256378 | 0.043489  |
| N | 0.566278  | 2.030473  | -0.212574 |
| H | -4.074878 | 1.949218  | -0.272435 |
| H | -1.599683 | 2.058210  | -0.278866 |
| H | -1.413918 | -2.213827 | 0.333709  |
| H | -3.891004 | -2.348983 | 0.349043  |
| H | -5.997697 | -1.130060 | 0.169003  |
| H | -6.064092 | 0.576839  | -0.076520 |
| H | 1.698381  | -1.756039 | -0.598899 |
| H | 3.993520  | -2.665236 | -0.555268 |
| H | 5.905226  | -1.200136 | 0.054337  |
| H | 5.505580  | 1.186129  | 0.627351  |
| H | 3.221183  | 2.101988  | 0.594469  |
| H | 1.360121  | 2.660647  | -0.327441 |

**SO<sub>2</sub> molecule**

E = -548.587464

|   |          |           |           |
|---|----------|-----------|-----------|
| S | 0.000000 | 0.000000  | 0.370795  |
| O | 0.000000 | 1.261895  | -0.370795 |
| O | 0.000000 | -1.261895 | -0.370795 |

E-Z transition structure for **3a** (radical cation)

E = -687.046745

$\langle S^2 \rangle = 0.757$

|   |           |           |           |
|---|-----------|-----------|-----------|
| C | 3.385417  | 1.089172  | 0.113472  |
| C | 2.278962  | 0.220192  | 0.147945  |
| C | 2.450489  | -1.138692 | -0.164662 |
| C | 3.713078  | -1.615336 | -0.508135 |
| C | 4.807512  | -0.748383 | -0.541199 |
| C | 4.641816  | 0.604893  | -0.229825 |
| C | 0.983985  | 0.808481  | 0.510131  |
| O | -0.057914 | -0.367993 | 0.564757  |
| C | -1.327620 | -0.211555 | 0.279181  |
| C | -1.837508 | 0.789491  | -0.605902 |
| C | -3.178328 | 0.840777  | -0.882911 |
| C | -4.082847 | -0.095107 | -0.289165 |
| C | -3.571940 | -1.099551 | 0.591569  |
| C | -2.233347 | -1.152688 | 0.864664  |
| N | -5.397296 | -0.034428 | -0.562120 |
| N | 0.627057  | 1.922107  | 0.807922  |
| H | -3.565516 | 1.587772  | -1.570199 |
| H | -1.157281 | 1.486585  | -1.077718 |
| H | -1.823237 | -1.902300 | 1.532817  |
| H | -4.255653 | -1.813468 | 1.041832  |
| H | -6.053164 | -0.691919 | -0.158623 |
| H | -5.778638 | 0.666112  | -1.185775 |
| H | 1.606456  | -1.816119 | -0.133196 |
| H | 3.843156  | -2.666159 | -0.747659 |
| H | 5.790073  | -1.126329 | -0.808099 |
| H | 5.492218  | 1.279222  | -0.254289 |
| H | 3.245164  | 2.136991  | 0.357848  |
| H | 0.333389  | 2.839631  | 1.053414  |

**3a\_Z radical cation**

E = -687.072864

$\langle S^2 \rangle = 0.758$

|   |           |           |           |
|---|-----------|-----------|-----------|
| C | 3.211231  | 0.666362  | -0.675225 |
| C | 2.077225  | 0.338000  | 0.092033  |
| C | 2.001470  | -0.914940 | 0.723587  |
| C | 3.043885  | -1.828261 | 0.583210  |
| C | 4.162716  | -1.500923 | -0.184892 |
| C | 4.244009  | -0.252854 | -0.812439 |
| C | 1.010096  | 1.336025  | 0.207425  |
| O | -0.091532 | 0.906536  | 1.060123  |
| C | -1.221094 | 0.457632  | 0.527219  |
| C | -1.410981 | 0.237094  | -0.867297 |
| C | -2.614008 | -0.239527 | -1.319579 |
| C | -3.679002 | -0.514345 | -0.403834 |
| C | -3.477128 | -0.289532 | 0.995802  |
| C | -2.276707 | 0.185579  | 1.446892  |
| N | -4.855279 | -0.978414 | -0.853547 |
| N | 1.003513  | 2.489248  | -0.296456 |
| H | -2.766336 | -0.414240 | -2.380697 |
| H | -0.606900 | 0.445838  | -1.563540 |
| H | -2.099202 | 0.367362  | 2.501483  |
| H | -4.283751 | -0.496920 | 1.692824  |
| H | -5.623046 | -1.179380 | -0.223669 |
| H | -5.020331 | -1.142674 | -1.839623 |
| H | 1.144667  | -1.170572 | 1.337209  |
| H | 2.984916  | -2.792708 | 1.078168  |
| H | 4.974310  | -2.214673 | -0.291319 |
| H | 5.116752  | 0.003142  | -1.405192 |
| H | 3.264002  | 1.640034  | -1.149993 |
| H | 0.179254  | 3.044795  | -0.064024 |



Transition structure for **3a\_Z** to form non-bonded complex

E = -687.044699

$\langle S^2 \rangle = 0.761$

|   |           |           |           |
|---|-----------|-----------|-----------|
| C | 3.274392  | 0.027465  | -1.078855 |
| C | 2.471915  | 0.480518  | -0.006699 |
| C | 2.279312  | -0.304992 | 1.151710  |
| C | 2.909118  | -1.538312 | 1.233786  |
| C | 3.711614  | -1.988941 | 0.176778  |
| C | 3.891834  | -1.212136 | -0.973256 |
| C | 1.898510  | 1.762154  | -0.087367 |
| O | -0.403433 | 1.562696  | 0.226368  |
| C | -1.431795 | 0.822831  | 0.108506  |
| C | -1.351487 | -0.586618 | -0.199794 |
| C | -2.478415 | -1.355136 | -0.323659 |
| C | -3.772556 | -0.781433 | -0.148148 |
| C | -3.878813 | 0.607995  | 0.158510  |
| C | -2.756153 | 1.379559  | 0.281623  |
| N | -4.883918 | -1.543458 | -0.270385 |
| N | 1.774002  | 2.932135  | -0.179136 |
| H | -2.399493 | -2.413374 | -0.560163 |
| H | -0.368445 | -1.024817 | -0.337498 |
| H | -2.826344 | 2.436715  | 0.516440  |
| H | -4.864755 | 1.045575  | 0.293556  |
| H | -5.807302 | -1.150851 | -0.152669 |
| H | -4.828269 | -2.527418 | -0.491936 |
| H | 1.642214  | 0.060203  | 1.949459  |
| H | 2.778341  | -2.152519 | 2.118695  |
| H | 4.200846  | -2.955595 | 0.251029  |
| H | 4.516146  | -1.572843 | -1.784098 |
| H | 3.410115  | 0.647303  | -1.958854 |
| H | 0.938967  | 3.507588  | -0.267059 |

*p*-aminophenol radical cation

E = -362.568568

$\langle S^2 \rangle = 0.759$

|   |           |           |          |
|---|-----------|-----------|----------|
| C | -0.005500 | -1.407926 | 0.000000 |
| C | 1.231101  | -0.706041 | 0.000000 |
| C | -1.239973 | -0.696988 | 0.000000 |
| C | 1.236013  | 0.664243  | 0.000000 |
| H | 2.167651  | -1.257220 | 0.000000 |
| C | -1.239646 | 0.670294  | 0.000000 |
| H | -2.163349 | -1.266174 | 0.000000 |
| C | 0.000000  | 1.389204  | 0.000000 |
| H | 2.175271  | 1.209352  | 0.000000 |
| H | -2.175957 | 1.220442  | 0.000000 |
| N | 0.004757  | 2.729847  | 0.000000 |
| H | -0.856670 | 3.264506  | 0.000000 |
| H | 0.868630  | 3.260378  | 0.000000 |
| O | -0.090652 | -2.731831 | 0.000000 |
| H | 0.784378  | -3.162288 | 0.000000 |

Benzonitrile

E = -324.492216

|   |          |           |           |
|---|----------|-----------|-----------|
| C | 0.000000 | 1.217349  | -0.091486 |
| C | 0.000000 | 1.210891  | -1.483885 |
| C | 0.000000 | 0.000000  | -2.180722 |
| C | 0.000000 | -1.210891 | -1.483885 |
| C | 0.000000 | -1.217349 | -0.091486 |
| C | 0.000000 | 0.000000  | 0.610317  |
| H | 0.000000 | 2.152593  | 0.459163  |
| H | 0.000000 | 2.152036  | -2.025928 |
| H | 0.000000 | 0.000000  | -3.267120 |
| H | 0.000000 | -2.152036 | -2.025928 |
| H | 0.000000 | -2.152593 | 0.459163  |
| C | 0.000000 | 0.000000  | 2.044923  |
| N | 0.000000 | 0.000000  | 3.208284  |

*p*-aminophenoxyl radical

E = -362.190942

$\langle S^2 \rangle = 0.774$

|   |           |           |           |
|---|-----------|-----------|-----------|
| C | 0.003696  | -0.755302 | 1.232089  |
| C | 0.003696  | 0.616291  | 1.225911  |
| C | 0.000898  | 1.335370  | 0.000000  |
| C | 0.003696  | 0.616291  | -1.225911 |
| C | 0.003696  | -0.755302 | -1.232089 |
| C | 0.002773  | -1.527416 | 0.000000  |
| H | 0.007215  | 1.173174  | 2.161234  |
| H | 0.007215  | 1.173174  | -2.161234 |
| H | 0.002056  | -1.314141 | -2.163027 |
| N | 0.039383  | 2.709109  | 0.000000  |
| H | -0.199897 | 3.198034  | 0.851180  |
| H | -0.199897 | 3.198034  | -0.851180 |
| O | -0.000646 | -2.782187 | 0.000000  |
| H | 0.002056  | -1.314141 | 2.163027  |

N-protonated benzonitrile (cation)

E = -324.819485

|   |          |           |           |
|---|----------|-----------|-----------|
| C | 0.000000 | 1.237904  | -0.156850 |
| C | 0.000000 | 1.220840  | -1.543503 |
| C | 0.000000 | 0.000000  | -2.231323 |
| C | 0.000000 | -1.220840 | -1.543503 |
| C | 0.000000 | -1.237904 | -0.156850 |
| C | 0.000000 | 0.000000  | 0.532047  |
| H | 0.000000 | 2.173935  | 0.391600  |
| H | 0.000000 | 2.156845  | -2.091985 |
| H | 0.000000 | 0.000000  | -3.317181 |
| H | 0.000000 | -2.156845 | -2.091985 |
| H | 0.000000 | -2.173935 | 0.391600  |
| C | 0.000000 | 0.000000  | 1.932527  |
| N | 0.000000 | 0.000000  | 3.089395  |
| H | 0.000000 | 0.000000  | 4.096921  |

### B3LYP/6-31G(d) structures and electronic energies for species in Figure 1b

**1b** radical cation

E = -1274.953318

$\langle S^2 \rangle = 0.762$

|   |           |           |           |
|---|-----------|-----------|-----------|
| C | -2.662590 | -1.900023 | 0.214380  |
| C | -3.944035 | -2.440263 | 0.235756  |
| C | -5.047014 | -1.633051 | -0.057257 |
| C | -4.869616 | -0.281850 | -0.371436 |
| C | -3.592859 | 0.272831  | -0.373914 |
| C | -2.483397 | -0.533304 | -0.065851 |
| H | -1.796106 | -2.519853 | 0.418772  |
| H | -4.084231 | -3.490664 | 0.471096  |
| H | -6.046163 | -2.058412 | -0.049826 |
| H | -5.726111 | 0.337720  | -0.618236 |
| H | -3.459239 | 1.315292  | -0.643720 |
| C | -1.092084 | -0.025755 | -0.134939 |
| O | -0.203894 | -0.740589 | -0.637827 |
| N | -0.758361 | 1.213607  | 0.355356  |
| C | -1.587105 | 2.097378  | 1.195583  |
| H | -0.942425 | 2.562783  | 1.942719  |
| H | -2.067514 | 2.877912  | 0.600001  |
| H | -2.342458 | 1.489536  | 1.692777  |
| S | 0.789321  | 1.844603  | -0.152964 |
| O | 1.183292  | 2.769008  | 0.904386  |
| O | 0.700851  | 2.245587  | -1.549713 |
| C | 1.848951  | 0.390829  | -0.064225 |
| C | 2.181796  | -0.152585 | 1.199893  |
| C | 2.535429  | -0.007173 | -1.238909 |
| C | 3.144864  | -1.125365 | 1.284643  |
| H | 1.683393  | 0.205352  | 2.094384  |
| C | 3.504225  | -0.972515 | -1.161324 |
| H | 2.271931  | 0.452465  | -2.184808 |
| C | 3.827530  | -1.559610 | 0.102531  |
| H | 3.411341  | -1.557987 | 2.244480  |
| H | 4.034217  | -1.296100 | -2.052230 |
| N | 4.773260  | -2.505958 | 0.183966  |
| H | 5.276431  | -2.824314 | -0.635853 |
| H | 5.026934  | -2.930236 | 1.068256  |

Smiles transition structure from **1b** (radical cation)

E = -1274.936829

$\langle S^2 \rangle = 0.759$

|   |           |           |           |
|---|-----------|-----------|-----------|
| C | -2.504896 | -1.846430 | -0.244978 |
| C | -3.738069 | -2.486704 | -0.249096 |
| C | -4.899751 | -1.771384 | 0.058718  |
| C | -4.831344 | -0.410787 | 0.373778  |
| C | -3.606084 | 0.246267  | 0.363136  |
| C | -2.434099 | -0.468537 | 0.044371  |
| H | -1.598148 | -2.395295 | -0.473727 |
| H | -3.795617 | -3.543990 | -0.487060 |
| H | -5.860482 | -2.277453 | 0.061606  |
| H | -5.732169 | 0.134974  | 0.635254  |
| H | -3.557627 | 1.292055  | 0.645300  |
| C | -1.122682 | 0.168323  | 0.060867  |
| O | -0.104474 | -0.594361 | 0.403405  |
| N | -0.856727 | 1.430562  | -0.237519 |
| C | -1.702804 | 2.444338  | -0.880958 |
| H | -2.135605 | 3.112501  | -0.132620 |
| H | -1.063855 | 3.018708  | -1.556411 |
| H | -2.489375 | 1.951913  | -1.454124 |
| S | 0.875162  | 1.816722  | 0.093751  |
| O | 0.942801  | 2.419514  | 1.418154  |
| O | 1.360030  | 2.492079  | -1.102583 |
| C | 1.335427  | -0.064033 | 0.152009  |
| C | 2.156496  | -0.357180 | 1.323782  |
| C | 1.839035  | -0.535554 | -1.133966 |
| C | 3.346492  | -1.012089 | 1.199898  |
| H | 1.801995  | -0.019407 | 2.290813  |
| C | 3.031489  | -1.196732 | -1.222303 |
| H | 1.256518  | -0.332882 | -2.026379 |
| C | 3.828585  | -1.452439 | -0.069122 |
| H | 3.940662  | -1.204215 | 2.089207  |
| H | 3.382213  | -1.530196 | -2.195274 |
| N | 5.013158  | -2.102418 | -0.172688 |
| H | 5.380995  | -2.390138 | -1.068501 |
| H | 5.599246  | -2.261343 | 0.634721  |

**3b...SO<sub>2</sub> complex (radical cation)**

E = -1274.982934

$\langle S^2 \rangle = 0.759$

|   |           |           |           |
|---|-----------|-----------|-----------|
| C | 3.058165  | -1.479510 | 0.362916  |
| C | 4.398278  | -1.848587 | 0.429190  |
| C | 5.394682  | -0.934749 | 0.075821  |
| C | 5.048319  | 0.350696  | -0.345271 |
| C | 3.709598  | 0.732099  | -0.399033 |
| C | 2.702613  | -0.179671 | -0.038226 |
| H | 2.286883  | -2.195425 | 0.628368  |
| H | 4.666192  | -2.850388 | 0.750592  |
| H | 6.439480  | -1.227277 | 0.121048  |
| H | 5.820007  | 1.055792  | -0.638292 |
| H | 3.448196  | 1.723213  | -0.753693 |
| C | 1.281849  | 0.214697  | -0.090418 |
| O | 0.499616  | -0.848985 | -0.611491 |
| N | 0.671133  | 1.290076  | 0.177138  |
| C | 1.325472  | 2.441674  | 0.782411  |
| H | 1.529531  | 3.193863  | 0.010785  |
| H | 0.623709  | 2.889744  | 1.492489  |
| H | 2.262382  | 2.200965  | 1.295417  |
| S | -1.977546 | 2.486540  | -0.515718 |
| O | -2.273248 | 2.551324  | 0.918400  |
| O | -2.551688 | 1.370067  | -1.276897 |
| C | -0.765232 | -1.081300 | -0.243474 |
| C | -1.534467 | -1.827539 | -1.179087 |
| C | -1.323954 | -0.701488 | 1.008310  |
| C | -2.843090 | -2.121526 | -0.913638 |
| H | -1.065368 | -2.121922 | -2.111413 |
| C | -2.632194 | -1.001138 | 1.279861  |
| H | -0.724804 | -0.168504 | 1.733512  |
| C | -3.433115 | -1.693552 | 0.317988  |
| H | -3.445160 | -2.663492 | -1.636776 |
| H | -3.072657 | -0.707227 | 2.227751  |
| N | -4.723675 | -1.952861 | 0.575677  |
| H | -5.166147 | -1.641801 | 1.432244  |
| H | -5.312708 | -2.432577 | -0.094452 |

**3b radical cation**

E = -726.387109

$\langle S^2 \rangle = 0.759$

|   |           |           |           |
|---|-----------|-----------|-----------|
| C | 4.216041  | -0.277756 | 0.096644  |
| C | 3.410169  | 0.684465  | 0.781975  |
| C | 2.047211  | 0.694054  | 0.634041  |
| C | 1.428185  | -0.270389 | -0.213346 |
| C | 2.223108  | -1.253912 | -0.872487 |
| C | 3.583581  | -1.257009 | -0.733097 |
| N | 5.550761  | -0.270801 | 0.240738  |
| N | -0.466644 | 1.806867  | -0.200094 |
| C | -1.344965 | 2.936118  | 0.054929  |
| C | -0.862960 | 0.611074  | -0.187074 |
| C | -2.187203 | -0.026835 | -0.035793 |
| C | -2.323277 | -1.204818 | 0.718401  |
| C | -3.575428 | -1.791021 | 0.878883  |
| C | -4.698822 | -1.220804 | 0.274280  |
| C | -4.567633 | -0.062033 | -0.492990 |
| C | -3.319156 | 0.537905  | -0.646605 |
| O | 0.119299  | -0.399608 | -0.424162 |
| H | 3.889757  | 1.408612  | 1.434216  |
| H | 1.443205  | 1.423917  | 1.151614  |
| H | 1.717808  | -1.981852 | -1.497911 |
| H | 4.189796  | -1.995126 | -1.249901 |
| H | 6.138859  | -0.949712 | -0.227420 |
| H | 6.018436  | 0.414984  | 0.821160  |
| H | -2.280755 | 2.674433  | 0.560944  |
| H | -0.796194 | 3.665125  | 0.659473  |
| H | -1.579782 | 3.426944  | -0.897025 |
| H | -1.451855 | -1.654440 | 1.183951  |
| H | -3.675249 | -2.695009 | 1.471937  |
| H | -5.673697 | -1.683586 | 0.395646  |
| H | -5.435973 | 0.373056  | -0.978099 |
| H | -3.220666 | 1.422830  | -1.266367 |

SO<sub>2</sub> molecule: see p. S6

Transition structure for **3b** dissociating to “complex” (radical cation)

E = -726.366654

$\langle S^2 \rangle = 0.757$

|   |           |           |           |
|---|-----------|-----------|-----------|
| C | -4.036150 | -0.418017 | 0.426770  |
| C | -2.990351 | 0.025548  | 1.294119  |
| C | -1.696808 | 0.088252  | 0.851316  |
| C | -1.361718 | -0.296704 | -0.491487 |
| C | -2.424581 | -0.739511 | -1.354676 |
| C | -3.715440 | -0.800838 | -0.912396 |
| N | -5.307079 | -0.477155 | 0.867258  |
| N | 0.717782  | 1.976489  | -0.344215 |
| C | 0.514914  | 3.380592  | -0.331296 |
| C | 1.073276  | 0.843672  | -0.351642 |
| C | 2.244548  | 0.020603  | -0.088840 |
| C | 2.283470  | -1.370040 | -0.276586 |
| C | 3.455602  | -2.068421 | 0.000812  |
| C | 4.586563  | -1.393178 | 0.465566  |
| C | 4.551206  | -0.008168 | 0.654321  |
| C | 3.387850  | 0.700284  | 0.378892  |
| O | -0.158064 | -0.297098 | -0.962699 |
| H | -3.233571 | 0.301237  | 2.316790  |
| H | -0.905593 | 0.402239  | 1.522771  |
| H | -2.161301 | -1.024233 | -2.367840 |
| H | -4.509375 | -1.138287 | -1.573139 |
| H | -6.058329 | -0.799758 | 0.271376  |
| H | -5.552602 | -0.220530 | 1.814432  |
| H | 1.361634  | 3.886690  | -0.807966 |
| H | -0.407804 | 3.647762  | -0.855566 |
| H | 0.444505  | 3.725098  | 0.706220  |
| H | 1.408972  | -1.888182 | -0.646898 |
| H | 3.486558  | -3.143184 | -0.148818 |
| H | 5.496990  | -1.945043 | 0.680186  |
| H | 5.429785  | 0.517619  | 1.015122  |
| H | 3.355445  | 1.775569  | 0.524380  |



Transition structure for CH<sub>3</sub><sup>+</sup> transfer, transforming “complex” to “complex\_alt” (radical cation)

E = -726.343256

$\langle S^2 \rangle = 0.760$

|   |           |           |           |
|---|-----------|-----------|-----------|
| C | -4.945544 | -0.564485 | 1.038478  |
| C | -6.321247 | -0.363580 | 1.062639  |
| C | -6.933234 | 0.420257  | 0.079499  |
| C | -6.175083 | 1.010041  | -0.936757 |
| C | -4.798168 | 0.821264  | -0.978772 |
| C | -4.185988 | 0.031419  | 0.013368  |
| H | -4.459030 | -1.171095 | 1.795252  |
| H | -6.917067 | -0.818203 | 1.847521  |
| H | -8.008116 | 0.572072  | 0.105261  |
| H | -6.658000 | 1.616455  | -1.696221 |
| H | -4.199071 | 1.272888  | -1.762682 |
| C | -2.776028 | -0.169338 | -0.021889 |
| O | 2.125930  | -1.393505 | -0.383376 |
| N | -1.627260 | -0.324809 | -0.046399 |
| C | 0.203205  | -0.758951 | -0.182938 |
| H | 0.379295  | -0.021628 | -0.949426 |
| H | -0.001682 | -1.778266 | -0.465395 |
| H | 0.398160  | -0.522887 | 0.850592  |
| C | 4.471740  | -1.368804 | -0.399104 |
| C | 5.649320  | -0.699706 | -0.214712 |
| C | 3.195090  | -0.720529 | -0.198204 |
| C | 5.647622  | 0.670446  | 0.184771  |
| H | 6.599318  | -1.204370 | -0.370488 |
| C | 3.217314  | 0.664363  | 0.204535  |
| C | 4.400242  | 1.331276  | 0.388495  |
| H | 2.276598  | 1.181629  | 0.363329  |
| H | 4.456354  | -2.410284 | -0.702571 |
| H | 4.399786  | 2.374851  | 0.692754  |
| N | 6.812387  | 1.332605  | 0.367178  |
| H | 6.830871  | 2.302153  | 0.650545  |
| H | 7.703801  | 0.878099  | 0.226639  |

“complex\_alt” non-bonded radical cation

E = -726.392676

$\langle S^2 \rangle = 0.758$

|   |           |           |           |
|---|-----------|-----------|-----------|
| C | 0.269230  | 4.257100  | 1.220706  |
| C | 0.269230  | 5.648791  | 1.212648  |
| C | 0.269261  | 6.343506  | 0.000000  |
| C | 0.269230  | 5.648791  | -1.212648 |
| C | 0.269230  | 4.257100  | -1.220706 |
| C | 0.269251  | 3.558898  | 0.000000  |
| H | 0.269575  | 3.708564  | 2.157134  |
| H | 0.269583  | 6.192159  | 2.152469  |
| H | 0.269499  | 7.429491  | 0.000000  |
| H | 0.269583  | 6.192159  | -2.152469 |
| H | 0.269575  | 3.708564  | -2.157134 |
| C | 0.270329  | 2.127211  | 0.000000  |
| O | 2.033741  | -2.994208 | 0.000000  |
| N | 0.272480  | 0.963767  | 0.000000  |
| C | 2.505147  | -1.624521 | 0.000000  |
| H | 2.154036  | -1.105208 | -0.894207 |
| H | 3.590564  | -1.704499 | 0.000000  |
| H | 2.154036  | -1.105208 | 0.894207  |
| C | 0.415056  | -4.657367 | 0.000000  |
| C | -0.890694 | -5.058768 | 0.000000  |
| C | 0.741833  | -3.265839 | 0.000000  |
| C | -1.937188 | -4.081982 | 0.000000  |
| H | -1.143535 | -6.114955 | 0.000000  |
| C | -0.290240 | -2.283758 | 0.000000  |
| C | -1.599949 | -2.692216 | 0.000000  |
| H | -0.056862 | -1.221543 | 0.000000  |
| H | 1.229563  | -5.373660 | 0.000000  |
| H | -2.395637 | -1.952535 | 0.000000  |
| N | -3.224335 | -4.467130 | 0.000000  |
| H | -3.979381 | -3.792370 | 0.000000  |
| H | -3.485897 | -5.445418 | 0.000000  |

*p*-aminoanisoole radical cation

E = -401.880534

$\langle S^2 \rangle = 0.758$

|   |           |           |           |
|---|-----------|-----------|-----------|
| C | 0.000000  | 0.973641  | 0.000000  |
| C | 1.120349  | 0.095803  | 0.000000  |
| C | -1.325680 | 0.439534  | 0.000000  |
| C | 0.919298  | -1.261553 | 0.000000  |
| H | 2.129674  | 0.489221  | 0.000000  |
| C | -1.527156 | -0.911350 | 0.000000  |
| H | -2.155933 | 1.137582  | 0.000000  |
| C | -0.405963 | -1.802208 | 0.000000  |
| H | 1.769250  | -1.937834 | 0.000000  |
| H | -2.534077 | -1.318072 | 0.000000  |
| N | -0.594133 | -3.130713 | 0.000000  |
| H | -1.523306 | -3.535114 | 0.000000  |
| H | 0.184472  | -3.779194 | 0.000000  |
| O | 0.073868  | 2.291820  | 0.000000  |
| C | 1.348205  | 2.974572  | 0.000000  |
| H | 1.912280  | 2.719615  | 0.901413  |
| H | 1.099028  | 4.033982  | 0.000000  |
| H | 1.912280  | 2.719615  | -0.901413 |

Benzonitrile: see p. S10

*p*-aminophenoxy radical: see p. S11

N-methylbenzotriliium cation

E = -364.153360

|   |           |           |           |
|---|-----------|-----------|-----------|
| C | -1.229723 | 0.764584  | 0.000000  |
| C | -1.206593 | 2.152358  | 0.000000  |
| C | 0.016416  | 2.834286  | 0.000000  |
| C | 1.231230  | 2.137902  | 0.000000  |
| C | 1.237938  | 0.749932  | 0.000000  |
| C | 0.000000  | 0.066753  | 0.000000  |
| H | -2.169583 | 0.222534  | 0.000000  |
| H | -2.140152 | 2.705118  | 0.000000  |
| H | 0.022861  | 3.920096  | 0.000000  |
| H | 2.171274  | 2.679561  | 0.000000  |
| H | 2.171270  | 0.196708  | 0.000000  |
| C | -0.008035 | -1.342085 | 0.000000  |
| N | -0.014571 | -2.498756 | 0.000000  |
| C | -0.020490 | -3.929374 | 0.000000  |
| H | 0.490700  | -4.285312 | 0.898034  |
| H | -1.059528 | -4.268238 | 0.000000  |
| H | 0.490700  | -4.285312 | -0.898034 |

### Smiles barrier heights plotted in Figure 3

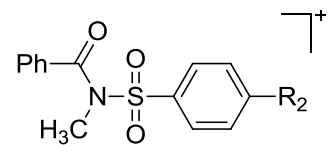

| R <sub>2</sub>      | $\Delta H_0^\ddagger$ (kJ mol <sup>-1</sup> ) | $\sigma_p^+$ |
|---------------------|-----------------------------------------------|--------------|
| OCH <sub>3</sub>    | 28.6                                          | -0.78        |
| NHAc                | 30.2                                          | -0.60        |
| CH <sub>3</sub>     | 15.5                                          | -0.31        |
| <i>t</i> -Bu        | 16.8                                          | -0.26        |
| F                   | 17.2                                          | -0.07        |
| H                   | 15.8                                          | 0            |
| Cl                  | 15.6                                          | 0.11         |
| CN                  | 13.3                                          | 0.66         |
| NO <sub>2</sub>     | 21.2                                          | 0.79         |
| Ac                  | 16.8                                          | not avail.   |
| NHCOCF <sub>3</sub> | 22.5                                          | not avail.   |

Values for  $\sigma_p^+$  are from: C. Hansch, A. Leo, R. W. Taft, *Chem. Rev.* **1991**, *91*, 165-195.

**B3LYP/6-31G(d) structures and electronic energies for species in Figure 3**

**Labeling as in Scheme 1**

$R_1 = \text{CH}_3$ ,  $R_2 = \text{NH}_2$  (radical cation)

This is **1b**; see p. S12

Smiles transition structure for  $R_1 = \text{CH}_3$ ,  $R_2 = \text{NH}_2$  (radical cation)

See p. S13

R<sub>1</sub> = CH<sub>3</sub>, R<sub>2</sub> = OCH<sub>3</sub> (radical cation)

E = -1334.108074

$\langle S^2 \rangle = 0.758$

|   |           |           |           |
|---|-----------|-----------|-----------|
| C | -2.647040 | -2.079276 | 0.324828  |
| C | -3.835040 | -2.801913 | 0.340248  |
| C | -5.026923 | -2.193914 | -0.064861 |
| C | -5.033968 | -0.858488 | -0.484269 |
| C | -3.854812 | -0.120210 | -0.484008 |
| C | -2.657740 | -0.725698 | -0.062140 |
| H | -1.711584 | -2.543693 | 0.617748  |
| H | -3.832458 | -3.839645 | 0.658382  |
| H | -5.952111 | -2.762415 | -0.062363 |
| H | -5.958870 | -0.395665 | -0.813766 |
| H | -3.860479 | 0.906846  | -0.833859 |
| C | -1.358292 | -0.017493 | -0.119644 |
| O | -0.364320 | -0.638412 | -0.562518 |
| N | -1.217078 | 1.272921  | 0.296097  |
| C | -2.201352 | 2.089052  | 1.029687  |
| H | -1.662973 | 2.693229  | 1.761699  |
| H | -2.751085 | 2.748153  | 0.352993  |
| H | -2.891287 | 1.420828  | 1.544673  |
| S | 0.274255  | 2.074563  | -0.177718 |
| O | 0.506834  | 3.069080  | 0.861610  |
| O | 0.185537  | 2.417392  | -1.589322 |
| C | 1.473072  | 0.743534  | 0.002124  |
| C | 1.830494  | 0.299309  | 1.298653  |
| C | 2.231222  | 0.373211  | -1.139237 |
| C | 2.891251  | -0.558149 | 1.439597  |
| H | 1.276514  | 0.641817  | 2.166048  |
| C | 3.300370  | -0.479699 | -1.001689 |
| H | 1.944633  | 0.762308  | -2.109957 |
| C | 3.640813  | -0.962729 | 0.291299  |
| H | 3.202944  | -0.930923 | 2.409331  |
| H | 3.874815  | -0.772547 | -1.871916 |
| O | 4.642177  | -1.783580 | 0.544787  |
| C | 5.503238  | -2.268059 | -0.511021 |
| H | 6.225820  | -2.910375 | -0.011311 |
| H | 4.921690  | -2.843998 | -1.236010 |
| H | 6.012317  | -1.430083 | -0.994725 |

Smiles transition structure for R<sub>1</sub> = CH<sub>3</sub>, R<sub>2</sub> = OCH<sub>3</sub> (radical cation)

E = -1334.096733

$\langle S^2 \rangle = 0.763$

|   |           |           |           |
|---|-----------|-----------|-----------|
| C | -2.546102 | -2.026362 | 0.283233  |
| C | -3.690380 | -2.814433 | 0.278584  |
| C | -4.920935 | -2.259825 | -0.087843 |
| C | -5.011248 | -0.912688 | -0.452020 |
| C | -3.877652 | -0.108027 | -0.432740 |
| C | -2.637088 | -0.660927 | -0.055846 |
| H | -1.586173 | -2.449654 | 0.557404  |
| H | -3.624833 | -3.861755 | 0.555268  |
| H | -5.811406 | -2.881186 | -0.097782 |
| H | -5.963958 | -0.492759 | -0.758114 |
| H | -3.949549 | 0.925585  | -0.752469 |
| C | -1.412329 | 0.129826  | -0.064114 |
| O | -0.299981 | -0.499260 | -0.356688 |
| N | -1.313903 | 1.427593  | 0.203490  |
| C | -2.298963 | 2.345817  | 0.792777  |
| H | -1.760045 | 3.011198  | 1.471636  |
| H | -2.787672 | 2.935925  | 0.013922  |
| H | -3.035322 | 1.770578  | 1.354903  |
| S | 0.340586  | 2.030772  | -0.122013 |
| O | 0.711988  | 2.825048  | 1.038584  |
| O | 0.360612  | 2.556302  | -1.478388 |
| C | 1.069667  | 0.286965  | -0.073305 |
| C | 1.564712  | -0.082800 | 1.252236  |
| C | 1.961598  | 0.044422  | -1.204962 |
| C | 2.772187  | -0.697518 | 1.392447  |
| H | 0.953188  | 0.142232  | 2.119417  |
| C | 3.174482  | -0.568155 | -1.029699 |
| H | 1.633416  | 0.362810  | -2.187677 |
| C | 3.604588  | -0.962166 | 0.264191  |
| H | 3.138575  | -0.985479 | 2.372504  |
| H | 3.804846  | -0.737311 | -1.894892 |
| O | 4.760538  | -1.564783 | 0.539534  |
| C | 5.692207  | -1.866703 | -0.513542 |
| H | 6.533134  | -2.352638 | -0.021132 |
| H | 5.241851  | -2.548287 | -1.241917 |
| H | 6.028166  | -0.947773 | -1.004001 |



R<sub>1</sub> = CH<sub>3</sub>, R<sub>2</sub> = NHAc (radical cation)

E = -1427.593232

$\langle S^2 \rangle = 0.760$

|   |           |           |           |
|---|-----------|-----------|-----------|
| C | 2.789867  | 2.374531  | 0.029866  |
| C | 3.851478  | 3.272782  | 0.027467  |
| C | 5.160561  | 2.805595  | -0.122535 |
| C | 5.410794  | 1.436664  | -0.268958 |
| C | 4.357111  | 0.528001  | -0.246823 |
| C | 3.041121  | 0.994215  | -0.080759 |
| H | 1.767402  | 2.724448  | 0.123436  |
| H | 3.660541  | 4.336151  | 0.132368  |
| H | 5.987826  | 3.508947  | -0.134714 |
| H | 6.426952  | 1.079655  | -0.403970 |
| H | 4.554061  | -0.529637 | -0.387771 |
| C | 1.871691  | 0.086028  | -0.138114 |
| O | 0.859511  | 0.444804  | -0.775148 |
| N | 1.873162  | -1.129647 | 0.492910  |
| C | 2.856483  | -1.627631 | 1.472256  |
| H | 2.319361  | -2.182207 | 2.243379  |
| H | 3.589566  | -2.286616 | 0.999962  |
| H | 3.359089  | -0.771573 | 1.921795  |
| S | 0.623274  | -2.252582 | -0.001218 |
| O | 0.412211  | -3.110825 | 1.158419  |
| O | 0.960269  | -2.778216 | -1.315885 |
| C | -0.806889 | -1.173655 | -0.188911 |
| C | -1.406087 | -0.602359 | 0.956739  |
| C | -1.464901 | -1.146943 | -1.441443 |
| C | -2.614143 | 0.045738  | 0.852767  |
| H | -0.916205 | -0.681950 | 1.921423  |
| C | -2.671320 | -0.507137 | -1.548202 |
| H | -0.999627 | -1.620885 | -2.298376 |
| C | -3.280157 | 0.113935  | -0.409651 |
| H | -3.055099 | 0.481309  | 1.736490  |
| H | -3.182785 | -0.470541 | -2.505882 |
| N | -4.476317 | 0.725563  | -0.623425 |
| H | -4.821192 | 0.692627  | -1.582077 |
| C | -5.443510 | 1.447300  | 0.166777  |
| O | -6.401248 | 1.848358  | -0.451113 |
| C | -5.234447 | 1.654904  | 1.641189  |
| H | -4.326266 | 2.234603  | 1.838593  |
| H | -5.170321 | 0.700208  | 2.174180  |
| H | -6.095459 | 2.210604  | 2.014073  |

Smiles transition structure for R<sub>1</sub> = CH<sub>3</sub>, R<sub>2</sub> = NHAc (radical cation)

E = -1427.581436

$\langle S^2 \rangle = 0.762$

|   |           |           |           |
|---|-----------|-----------|-----------|
| C | -2.826158 | -2.217238 | -0.314524 |
| C | -3.857566 | -3.148022 | -0.301457 |
| C | -5.138738 | -2.767462 | 0.110713  |
| C | -5.392667 | -1.452466 | 0.513030  |
| C | -4.374228 | -0.506417 | 0.486533  |
| C | -3.083736 | -0.883504 | 0.063088  |
| H | -1.827681 | -2.505113 | -0.624292 |
| H | -3.664427 | -4.171206 | -0.607246 |
| H | -5.940315 | -3.499800 | 0.126685  |
| H | -6.382606 | -1.167759 | 0.854564  |
| H | -4.570713 | 0.500883  | 0.836330  |
| C | -1.972150 | 0.059804  | 0.060569  |
| O | -0.778792 | -0.425671 | 0.302876  |
| N | -2.052058 | 1.366035  | -0.171396 |
| C | -3.167334 | 2.162501  | -0.703463 |
| H | -3.706690 | 2.657496  | 0.107487  |
| H | -2.741421 | 2.914712  | -1.371864 |
| H | -3.836936 | 1.511993  | -1.267045 |
| S | -0.481593 | 2.173155  | 0.121276  |
| O | -0.487866 | 2.674589  | 1.486877  |
| O | -0.250364 | 3.028069  | -1.032908 |
| C | 0.468843  | 0.542647  | 0.016604  |
| C | 1.410634  | 0.393492  | 1.121108  |
| C | 0.989355  | 0.273651  | -1.320067 |
| C | 2.688686  | -0.044097 | 0.915305  |
| H | 1.066964  | 0.643787  | 2.118118  |
| C | 2.266708  | -0.168838 | -1.490303 |
| H | 0.344063  | 0.433962  | -2.176975 |
| C | 3.165584  | -0.354370 | -0.392135 |
| H | 3.336430  | -0.136213 | 1.774666  |
| H | 2.620865  | -0.373065 | -2.497500 |
| N | 4.426851  | -0.801934 | -0.697211 |
| H | 4.609520  | -0.949091 | -1.687228 |
| C | 5.605990  | -1.139688 | 0.026532  |
| O | 6.546596  | -1.512739 | -0.641595 |
| C | 5.640542  | -1.029268 | 1.528938  |
| H | 5.493572  | 0.005747  | 1.856691  |
| H | 4.876752  | -1.659449 | 1.997026  |
| H | 6.625395  | -1.364395 | 1.855603  |

$R_1 = \text{CH}_3, R_2 = \text{CH}_3$  (radical cation)

$E = -1258.890271$

$\langle S^2 \rangle = 0.759$

|   |           |           |           |
|---|-----------|-----------|-----------|
| C | 2.577566  | -1.888276 | -0.326941 |
| C | 3.836110  | -2.478632 | -0.332127 |
| C | 4.952436  | -1.743356 | 0.077711  |
| C | 4.815169  | -0.410692 | 0.491545  |
| C | 3.564964  | 0.196591  | 0.485015  |
| C | 2.444311  | -0.536742 | 0.052633  |
| H | 1.699204  | -2.450849 | -0.624063 |
| H | 3.947773  | -3.511796 | -0.644894 |
| H | 5.933254  | -2.209229 | 0.084249  |
| H | 5.684865  | 0.149480  | 0.819957  |
| H | 3.455611  | 1.220033  | 0.828570  |
| C | 1.079918  | 0.035475  | 0.099777  |
| O | 0.186418  | -0.696238 | 0.603637  |
| N | 0.779730  | 1.270664  | -0.354063 |
| C | 1.657284  | 2.171589  | -1.121880 |
| H | 1.051421  | 2.663354  | -1.884876 |
| H | 2.106170  | 2.927739  | -0.472911 |
| H | 2.435331  | 1.576971  | -1.600695 |
| S | -0.807619 | 1.915284  | 0.112896  |
| O | -1.174661 | 2.795624  | -0.986828 |
| O | -0.713421 | 2.367398  | 1.491807  |
| C | -1.810918 | 0.422538  | 0.061385  |
| C | -2.131990 | -0.152642 | -1.191413 |
| C | -2.476625 | 0.025597  | 1.248630  |
| C | -3.069631 | -1.161301 | -1.234467 |
| H | -1.653794 | 0.204987  | -2.097303 |
| C | -3.415475 | -0.982287 | 1.178480  |
| H | -2.227658 | 0.509748  | 2.186383  |
| C | -3.732311 | -1.599218 | -0.055222 |
| H | -3.324139 | -1.620434 | -2.185162 |
| H | -3.924985 | -1.305991 | 2.080794  |
| C | -4.776048 | -2.668515 | -0.132515 |
| H | -4.941284 | -3.150541 | 0.834308  |
| H | -5.734113 | -2.228143 | -0.448451 |
| H | -4.519114 | -3.429562 | -0.876392 |

Smiles transition structure for R<sub>1</sub> = CH<sub>3</sub>, R<sub>2</sub> = CH<sub>3</sub> (radical cation)

E = -1258.884210

$\langle S^2 \rangle = 0.770$

|   |           |           |           |
|---|-----------|-----------|-----------|
| C | 2.449662  | -1.897253 | -0.239551 |
| C | 3.672908  | -2.556419 | -0.235663 |
| C | 4.843233  | -1.857936 | 0.078101  |
| C | 4.793854  | -0.495666 | 0.390327  |
| C | 3.578954  | 0.180369  | 0.370915  |
| C | 2.399072  | -0.517831 | 0.045619  |
| H | 1.535159  | -2.431895 | -0.471523 |
| H | 3.715997  | -3.614883 | -0.471394 |
| H | 5.796215  | -2.378358 | 0.087535  |
| H | 5.701548  | 0.036693  | 0.655697  |
| H | 3.544465  | 1.227725  | 0.649761  |
| C | 1.090988  | 0.132978  | 0.062628  |
| O | 0.071187  | -0.579285 | 0.431729  |
| N | 0.854624  | 1.403199  | -0.279137 |
| C | 1.731728  | 2.373419  | -0.952399 |
| H | 1.114449  | 2.950153  | -1.645124 |
| H | 2.192935  | 3.046762  | -0.226058 |
| H | 2.496684  | 1.833002  | -1.510617 |
| S | -0.807685 | 1.897478  | 0.105371  |
| O | -1.285460 | 2.637313  | -1.051474 |
| O | -0.813413 | 2.442494  | 1.452771  |
| C | -1.462655 | 0.162997  | 0.127582  |
| C | -1.913223 | -0.332408 | -1.161228 |
| C | -2.271033 | -0.139782 | 1.296749  |
| C | -2.993114 | -1.173563 | -1.228434 |
| H | -1.378814 | -0.035433 | -2.057300 |
| C | -3.345990 | -0.977120 | 1.180208  |
| H | -1.987536 | 0.297755  | 2.247187  |
| C | -3.737843 | -1.532212 | -0.072337 |
| H | -3.304173 | -1.558613 | -2.195203 |
| H | -3.929690 | -1.213203 | 2.065609  |
| C | -4.931302 | -2.431139 | -0.162615 |
| H | -4.908703 | -3.198900 | 0.619746  |
| H | -5.855164 | -1.854914 | -0.008140 |
| H | -5.002730 | -2.922720 | -1.135777 |

R<sub>1</sub> = CH<sub>3</sub>, R<sub>2</sub> = *tert*-Bu (radical cation)

E = -1376.829672

$\langle S^2 \rangle = 0.759$

|   |           |           |           |
|---|-----------|-----------|-----------|
| C | 2.828286  | 2.248497  | 0.298085  |
| C | 3.900945  | 3.133003  | 0.297943  |
| C | 5.169078  | 2.690919  | -0.090565 |
| C | 5.370319  | 1.359260  | -0.477134 |
| C | 4.309417  | 0.460634  | -0.463649 |
| C | 3.036830  | 0.900386  | -0.055404 |
| H | 1.834878  | 2.580967  | 0.579021  |
| H | 3.749309  | 4.167058  | 0.590464  |
| H | 6.003671  | 3.385513  | -0.100963 |
| H | 6.354573  | 1.026114  | -0.790716 |
| H | 4.461855  | -0.563818 | -0.787061 |
| C | 1.856438  | 0.008638  | -0.097784 |
| O | 0.802361  | 0.484755  | -0.596415 |
| N | 1.876584  | -1.262140 | 0.364070  |
| C | 2.948889  | -1.911822 | 1.137941  |
| H | 2.482163  | -2.550065 | 1.890272  |
| H | 3.586074  | -2.520940 | 0.491846  |
| H | 3.540933  | -1.140332 | 1.630388  |
| S | 0.504382  | -2.282897 | -0.099793 |
| O | 0.354052  | -3.214957 | 1.008940  |
| O | 0.714652  | -2.716064 | -1.472246 |
| C | -0.837783 | -1.084369 | -0.072561 |
| C | -1.288004 | -0.571912 | 1.168212  |
| C | -1.604284 | -0.915109 | -1.252422 |
| C | -2.458714 | 0.155793  | 1.206319  |
| H | -0.722103 | -0.760421 | 2.074709  |
| C | -2.772458 | -0.191719 | -1.185793 |
| H | -1.253948 | -1.347463 | -2.183023 |
| C | -3.237913 | 0.371746  | 0.037191  |
| H | -2.795015 | 0.552417  | 2.155977  |
| H | -3.353703 | -0.056667 | -2.090845 |
| C | -4.540089 | 1.159376  | 0.057410  |
| C | -4.888389 | 1.707306  | 1.453967  |
| C | -4.418376 | 2.355235  | -0.928646 |
| C | -5.691680 | 0.224470  | -0.411109 |
| H | -5.034330 | 0.906784  | 2.187642  |
| H | -4.121965 | 2.393901  | 1.830732  |
| H | -5.825778 | 2.268286  | 1.396857  |
| H | -4.225652 | 2.033740  | -1.956594 |
| H | -5.360242 | 2.913511  | -0.927103 |
| H | -3.617458 | 3.038400  | -0.626934 |
| H | -6.630959 | 0.787199  | -0.401583 |
| H | -5.539293 | -0.150149 | -1.427719 |
| H | -5.802797 | -0.634562 | 0.258584  |

Smiles transition structure for R<sub>1</sub> = CH<sub>3</sub>, R<sub>2</sub> = *tert*-Bu (radical cation)

E = -1376.823260

$\langle S^2 \rangle = 0.770$

|   |           |           |           |
|---|-----------|-----------|-----------|
| C | -2.767249 | -2.205411 | 0.226083  |
| C | -3.807043 | -3.127267 | 0.223887  |
| C | -5.109094 | -2.712825 | -0.074055 |
| C | -5.375769 | -1.372811 | -0.371910 |
| C | -4.347694 | -0.436650 | -0.353790 |
| C | -3.036314 | -0.848787 | -0.044739 |
| H | -1.752410 | -2.518375 | 0.445425  |
| H | -3.604314 | -4.169509 | 0.448443  |
| H | -5.917633 | -3.437605 | -0.082486 |
| H | -6.383669 | -1.060110 | -0.625123 |
| H | -4.556419 | 0.593437  | -0.620915 |
| C | -1.912202 | 0.084739  | -0.063407 |
| O | -0.758863 | -0.372625 | -0.445843 |
| N | -1.969536 | 1.371892  | 0.288559  |
| C | -3.036793 | 2.111236  | 0.979277  |
| H | -2.559363 | 2.800356  | 1.679792  |
| H | -3.640069 | 2.676052  | 0.264579  |
| H | -3.659623 | 1.405845  | 1.530032  |
| S | -0.461100 | 2.231609  | -0.095764 |
| O | -0.153787 | 3.045152  | 1.069661  |
| O | -0.590068 | 2.783757  | -1.434302 |
| C | 0.561625  | 0.682848  | -0.146689 |
| C | 1.131633  | 0.291660  | 1.129887  |
| C | 1.413100  | 0.590012  | -1.320051 |
| C | 2.383461  | -0.266416 | 1.183311  |
| H | 0.549642  | 0.439527  | 2.033488  |
| C | 2.657911  | 0.037021  | -1.215286 |
| H | 1.029475  | 0.955441  | -2.265801 |
| C | 3.194939  | -0.427353 | 0.025998  |
| H | 2.765521  | -0.570281 | 2.150329  |
| H | 3.263176  | -0.033351 | -2.112537 |
| C | 4.591103  | -1.038280 | 0.068959  |
| C | 4.995895  | -1.489911 | 1.484625  |
| C | 4.629249  | -2.270803 | -0.874517 |
| C | 5.615730  | 0.018957  | -0.426208 |
| H | 5.030523  | -0.652594 | 2.190582  |
| H | 4.319812  | -2.255517 | 1.881918  |
| H | 5.998398  | -1.926882 | 1.452447  |
| H | 4.398743  | -2.009675 | -1.912193 |
| H | 5.633821  | -2.706301 | -0.859121 |
| H | 3.921098  | -3.041092 | -0.550603 |
| H | 6.620201  | -0.416900 | -0.407169 |
| H | 5.416605  | 0.344677  | -1.452128 |
| H | 5.617659  | 0.903828  | 0.218988  |

R<sub>1</sub> = CH<sub>3</sub>, R<sub>2</sub> = F (radical cation)

E = -1318.798045

$\langle S^2 \rangle = 0.758$

|   |           |           |           |
|---|-----------|-----------|-----------|
| C | 2.607290  | -1.834018 | -0.367564 |
| C | 3.878269  | -2.396109 | -0.372505 |
| C | 4.971685  | -1.648308 | 0.075460  |
| C | 4.799600  | -0.329950 | 0.526469  |
| C | 3.537264  | 0.249757  | 0.521250  |
| C | 2.440185  | -0.495122 | 0.048032  |
| H | 1.745353  | -2.406505 | -0.692397 |
| H | 4.017601  | -3.416919 | -0.713170 |
| H | 5.962472  | -2.092525 | 0.083730  |
| H | 5.653198  | 0.238861  | 0.881112  |
| H | 3.399545  | 1.260620  | 0.891019  |
| C | 1.062560  | 0.046212  | 0.094886  |
| O | 0.198137  | -0.716843 | 0.602288  |
| N | 0.729836  | 1.272663  | -0.352367 |
| C | 1.593070  | 2.199497  | -1.106536 |
| H | 0.984581  | 2.678126  | -1.875689 |
| H | 2.013586  | 2.964153  | -0.448629 |
| H | 2.392435  | 1.627113  | -1.577457 |
| S | -0.876254 | 1.884667  | 0.111144  |
| O | -1.252180 | 2.758826  | -0.989650 |
| O | -0.792264 | 2.333610  | 1.491280  |
| C | -1.853181 | 0.377122  | 0.054176  |
| C | -2.169255 | -0.191254 | -1.202777 |
| C | -2.486654 | -0.050944 | 1.248518  |
| C | -3.070194 | -1.233971 | -1.256322 |
| H | -1.718447 | 0.197392  | -2.109770 |
| C | -3.392800 | -1.089396 | 1.191878  |
| H | -2.241890 | 0.435172  | 2.186260  |
| C | -3.666839 | -1.669749 | -0.056842 |
| H | -3.346875 | -1.710087 | -2.190624 |
| H | -3.898175 | -1.460859 | 2.076480  |
| F | -4.531969 | -2.665024 | -0.115854 |

Smiles transition structure for R<sub>1</sub> = CH<sub>3</sub>, R<sub>2</sub> = F (radical cation)

E = -1318.791368

$\langle S^2 \rangle = 0.770$

|   |           |           |           |
|---|-----------|-----------|-----------|
| C | 2.459468  | -1.859069 | -0.248087 |
| C | 3.693949  | -2.496486 | -0.242708 |
| C | 4.850553  | -1.779014 | 0.079438  |
| C | 4.776283  | -0.419330 | 0.398813  |
| C | 3.550147  | 0.235548  | 0.378137  |
| C | 2.383564  | -0.481737 | 0.044153  |
| H | 1.555981  | -2.408938 | -0.487391 |
| H | 3.756646  | -3.552690 | -0.483934 |
| H | 5.812467  | -2.282684 | 0.089894  |
| H | 5.673502  | 0.127181  | 0.670838  |
| H | 3.496588  | 1.280408  | 0.663140  |
| C | 1.065639  | 0.145452  | 0.058812  |
| O | 0.055301  | -0.590369 | 0.415080  |
| N | 0.806191  | 1.413863  | -0.272083 |
| C | 1.669031  | 2.408038  | -0.930547 |
| H | 1.045171  | 2.979307  | -1.621867 |
| H | 2.112324  | 3.082499  | -0.194287 |
| H | 2.447385  | 1.887350  | -1.488933 |
| S | -0.866168 | 1.874542  | 0.104665  |
| O | -1.355748 | 2.603206  | -1.053695 |
| O | -0.893055 | 2.413361  | 1.453826  |
| C | -1.484573 | 0.125467  | 0.120607  |
| C | -1.930168 | -0.368539 | -1.174164 |
| C | -2.281424 | -0.196620 | 1.295906  |
| C | -2.979766 | -1.245009 | -1.249347 |
| H | -1.412755 | -0.043584 | -2.070111 |
| C | -3.330867 | -1.069748 | 1.193576  |
| H | -2.007657 | 0.252077  | 2.243785  |
| C | -3.666473 | -1.601949 | -0.069287 |
| H | -3.314897 | -1.648719 | -2.198892 |
| H | -3.924693 | -1.345053 | 2.058741  |
| F | -4.680986 | -2.445387 | -0.156060 |



R<sub>1</sub> = CH<sub>3</sub>, R<sub>2</sub> = H (radical cation)

E = -1219.565295

$\langle S^2 \rangle = 0.759$

|   |           |           |           |
|---|-----------|-----------|-----------|
| C | 2.645639  | -1.573929 | -0.453407 |
| C | 3.986639  | -1.922102 | -0.546233 |
| C | 4.967548  | -1.027471 | -0.104145 |
| C | 4.610953  | 0.227891  | 0.426235  |
| C | 3.276310  | 0.594818  | 0.511967  |
| C | 2.291123  | -0.293300 | 0.034935  |
| H | 1.867541  | -2.262849 | -0.763413 |
| H | 4.269999  | -2.890698 | -0.944672 |
| H | 6.015700  | -1.305993 | -0.158036 |
| H | 5.382832  | 0.910071  | 0.767999  |
| H | 2.994516  | 1.553733  | 0.935029  |
| C | 0.842809  | 0.022280  | 0.168032  |
| O | 0.226765  | -0.857627 | 0.819659  |
| N | 0.270920  | 1.129792  | -0.320246 |
| C | 0.941704  | 2.127908  | -1.173110 |
| H | 0.241450  | 2.441615  | -1.948044 |
| H | 1.242054  | 3.000053  | -0.586958 |
| H | 1.815377  | 1.667571  | -1.635496 |
| S | -1.403660 | 1.533479  | 0.221939  |
| O | -1.856760 | 2.467189  | -0.797241 |
| O | -1.303342 | 1.869201  | 1.632483  |
| C | -2.244072 | -0.032886 | 0.035972  |
| C | -2.762387 | -0.382571 | -1.209605 |
| C | -2.406564 | -0.849064 | 1.178579  |
| C | -3.442813 | -1.595292 | -1.319981 |
| H | -2.656056 | 0.280764  | -2.061133 |
| C | -3.087397 | -2.062668 | 1.043213  |
| H | -2.037033 | -0.513335 | 2.140175  |
| C | -3.598971 | -2.433184 | -0.196829 |
| H | -3.865749 | -1.889042 | -2.275583 |
| H | -3.226606 | -2.699335 | 1.910553  |
| H | -4.138339 | -3.369450 | -0.302679 |

Smiles transition structure for R<sub>1</sub> = CH<sub>3</sub>, R<sub>2</sub> = H (radical cation)

E = -1219.559394

$\langle S^2 \rangle = 0.775$

|   |           |           |           |
|---|-----------|-----------|-----------|
| C | 2.494062  | -1.628141 | -0.278790 |
| C | 3.814332  | -2.061347 | -0.268798 |
| C | 4.837811  | -1.177537 | 0.088095  |
| C | 4.544040  | 0.144720  | 0.436892  |
| C | 3.229398  | 0.596729  | 0.412119  |
| C | 2.196831  | -0.288481 | 0.043281  |
| H | 1.691837  | -2.308013 | -0.543770 |
| H | 4.047290  | -3.087837 | -0.532926 |
| H | 5.867506  | -1.521927 | 0.102682  |
| H | 5.339586  | 0.820114  | 0.734704  |
| H | 3.005710  | 1.612697  | 0.718570  |
| C | 0.793113  | 0.119931  | 0.056280  |
| O | -0.083617 | -0.766271 | 0.405167  |
| N | 0.341250  | 1.336352  | -0.270463 |
| C | 1.046214  | 2.454475  | -0.917944 |
| H | 0.352183  | 2.919990  | -1.621431 |
| H | 1.365338  | 3.190907  | -0.176730 |
| H | 1.906714  | 2.062407  | -1.460505 |
| S | -1.377666 | 1.544768  | 0.112699  |
| O | -1.965356 | 2.223020  | -1.030628 |
| O | -1.478110 | 2.046287  | 1.472731  |
| C | -1.761733 | -0.262185 | 0.092842  |
| C | -2.093947 | -0.809869 | -1.208453 |
| C | -2.492723 | -0.724066 | 1.257415  |
| C | -2.984778 | -1.850741 | -1.294843 |
| H | -1.625483 | -0.393272 | -2.093658 |
| C | -3.381034 | -1.762576 | 1.127836  |
| H | -2.302633 | -0.244655 | 2.210893  |
| C | -3.627402 | -2.346452 | -0.136102 |
| H | -3.216581 | -2.280406 | -2.264199 |
| H | -3.912525 | -2.125744 | 2.001595  |
| H | -4.333485 | -3.166075 | -0.222311 |

R<sub>1</sub> = CH<sub>3</sub>, R<sub>2</sub> = Cl (radical cation)

E = -1679.159155

$\langle S^2 \rangle = 0.758$

|    |          |          |          |
|----|----------|----------|----------|
| C  | 2.60828  | -2.05572 | -0.33229 |
| C  | 3.78941  | -2.78797 | -0.34029 |
| C  | 4.98299  | -2.18758 | 0.07236  |
| C  | 5.00119  | -0.84735 | 0.49010  |
| C  | 3.83059  | -0.09929 | 0.48690  |
| C  | 2.63319  | -0.69684 | 0.04996  |
| H  | 1.66991  | -2.51154 | -0.62867 |
| H  | 3.78066  | -3.82630 | -0.65551 |
| H  | 5.90337  | -2.76369 | 0.07898  |
| H  | 5.93089  | -0.39303 | 0.81759  |
| H  | 3.84053  | 0.92970  | 0.83126  |
| C  | 1.34165  | 0.02673  | 0.10424  |
| O  | 0.38708  | -0.59867 | 0.63310  |
| N  | 1.17344  | 1.28145  | -0.36267 |
| C  | 2.14463  | 2.07151  | -1.14080 |
| H  | 1.59697  | 2.62044  | -1.90863 |
| H  | 2.67607  | 2.77903  | -0.49936 |
| H  | 2.85079  | 1.38899  | -1.61405 |
| S  | -0.32541 | 2.11185  | 0.10966  |
| O  | -0.58605 | 3.02622  | -0.99224 |
| O  | -0.17225 | 2.54979  | 1.48753  |
| C  | -1.51011 | 0.75799  | 0.06519  |
| C  | -1.90343 | 0.22773  | -1.18356 |
| C  | -2.19733 | 0.43548  | 1.25947  |
| C  | -2.94502 | -0.67616 | -1.22791 |
| H  | -1.40264 | 0.53704  | -2.09497 |
| C  | -3.24294 | -0.46400 | 1.21028  |
| H  | -1.88742 | 0.88865  | 2.19458  |
| C  | -3.61139 | -1.02404 | -0.02982 |
| H  | -3.27101 | -1.10654 | -2.16830 |
| H  | -3.78342 | -0.73876 | 2.10913  |
| Cl | -4.91016 | -2.14503 | -0.09459 |

Smiles transition structure for R<sub>1</sub> = CH<sub>3</sub>, R<sub>2</sub> = Cl (radical cation)

E = -1679.153254

$\langle S^2 \rangle = 0.769$

|    |          |          |          |
|----|----------|----------|----------|
| C  | 2.48647  | -2.05821 | -0.24050 |
| C  | 3.62905  | -2.84882 | -0.23332 |
| C  | 4.86902  | -2.28345 | 0.08115  |
| C  | 4.97058  | -0.92329 | 0.39071  |
| C  | 3.83831  | -0.11675 | 0.36830  |
| C  | 2.58869  | -0.68081 | 0.04175  |
| H  | 1.51889  | -2.48916 | -0.47296 |
| H  | 3.55501  | -3.90601 | -0.46693 |
| H  | 5.75850  | -2.90616 | 0.09344  |
| H  | 5.93133  | -0.49442 | 0.65670  |
| H  | 3.91961  | 0.92824  | 0.64627  |
| C  | 1.36007  | 0.10981  | 0.05821  |
| O  | 0.26978  | -0.48271 | 0.43187  |
| N  | 1.26663  | 1.39865  | -0.28937 |
| C  | 2.24806  | 2.26088  | -0.96764 |
| H  | 1.70120  | 2.89656  | -1.66780 |
| H  | 2.77889  | 2.88464  | -0.24469 |
| H  | 2.94941  | 1.63324  | -1.51780 |
| S  | -0.32025 | 2.08700  | 0.09903  |
| O  | -0.71409 | 2.87315  | -1.05842 |
| O  | -0.26035 | 2.62920  | 1.44587  |
| C  | -1.18727 | 0.45298  | 0.13096  |
| C  | -1.69713 | 0.00312  | -1.15068 |
| C  | -2.00564 | 0.24635  | 1.31122  |
| C  | -2.85000 | -0.73335 | -1.20963 |
| H  | -1.15073 | 0.24868  | -2.05485 |
| C  | -3.15793 | -0.48764 | 1.22601  |
| H  | -1.67303 | 0.66780  | 2.25295  |
| C  | -3.58418 | -0.99965 | -0.02566 |
| H  | -3.22345 | -1.09470 | -2.16178 |
| H  | -3.76158 | -0.66573 | 2.10939  |
| Cl | -5.02693 | -1.92292 | -0.11592 |

R<sub>1</sub> = CH<sub>3</sub>, R<sub>2</sub> = CN (radical cation)

E = -1311.794380

$\langle S^2 \rangle = 0.759$

|   |          |          |          |
|---|----------|----------|----------|
| C | 2.57769  | -2.00625 | -0.40864 |
| C | 3.77453  | -2.70720 | -0.46140 |
| C | 4.95341  | -2.09844 | -0.01603 |
| C | 4.94222  | -0.77652 | 0.47627  |
| C | 3.75675  | -0.05962 | 0.52260  |
| C | 2.57601  | -0.66152 | 0.04119  |
| H | 1.64675  | -2.46703 | -0.72020 |
| H | 3.79131  | -3.72755 | -0.82973 |
| H | 5.88766  | -2.65150 | -0.03686 |
| H | 5.86532  | -0.31956 | 0.81838  |
| H | 3.73895  | 0.95155  | 0.91631  |
| C | 1.26394  | 0.03224  | 0.13737  |
| O | 0.42133  | -0.63531 | 0.78464  |
| N | 1.00966  | 1.24353  | -0.37272 |
| C | 1.92777  | 2.02761  | -1.21874 |
| H | 1.34354  | 2.50349  | -2.00743 |
| H | 2.43465  | 2.79732  | -0.63128 |
| H | 2.65892  | 1.35207  | -1.66432 |
| S | -0.50513 | 2.06899  | 0.14730  |
| O | -0.74470 | 3.01791  | -0.92839 |
| O | -0.31070 | 2.45660  | 1.53401  |
| C | -1.70726 | 0.73955  | 0.06524  |
| C | -2.19789 | 0.34758  | -1.18816 |
| C | -2.22182 | 0.22277  | 1.27124  |
| C | -3.19713 | -0.61116 | -1.23713 |
| H | -1.82085 | 0.80108  | -2.09854 |
| C | -3.22647 | -0.73265 | 1.21457  |
| H | -1.83357 | 0.57491  | 2.22004  |
| C | -3.71150 | -1.15781 | -0.03523 |
| H | -3.60299 | -0.93660 | -2.18892 |
| H | -3.64083 | -1.14932 | 2.12588  |
| C | -4.73980 | -2.14788 | -0.10238 |
| N | -5.57208 | -2.95930 | -0.16254 |

Smiles transition structure for R<sub>1</sub> = CH<sub>3</sub>, R<sub>2</sub> = CN (radical cation)

E = -1311.789539

$\langle S^2 \rangle = 0.777$

|   |          |          |          |
|---|----------|----------|----------|
| C | 2.41172  | -2.05615 | -0.24950 |
| C | 3.56985  | -2.82372 | -0.23724 |
| C | 4.79523  | -2.23508 | 0.09158  |
| C | 4.86713  | -0.87443 | 0.40967  |
| C | 3.71940  | -0.09054 | 0.38289  |
| C | 2.48492  | -0.67827 | 0.04059  |
| H | 1.45479  | -2.50480 | -0.49246 |
| H | 3.51931  | -3.88077 | -0.47755 |
| H | 5.69698  | -2.83975 | 0.10821  |
| H | 5.81724  | -0.42804 | 0.68490  |
| H | 3.77651  | 0.95482  | 0.66591  |
| C | 1.23834  | 0.08732  | 0.05823  |
| O | 0.17180  | -0.51909 | 0.45430  |
| N | 1.12190  | 1.37196  | -0.31065 |
| C | 2.09214  | 2.23230  | -1.00941 |
| H | 1.53793  | 2.84852  | -1.72083 |
| H | 2.61979  | 2.87520  | -0.30111 |
| H | 2.79749  | 1.59939  | -1.54824 |
| S | -0.45044 | 2.06804  | 0.10199  |
| O | -0.84525 | 2.87500  | -1.04024 |
| O | -0.37923 | 2.58356  | 1.45812  |
| C | -1.36131 | 0.47042  | 0.11898  |
| C | -1.82550 | -0.01293 | -1.15950 |
| C | -2.15837 | 0.23594  | 1.29954  |
| C | -2.93239 | -0.81743 | -1.21739 |
| H | -1.28754 | 0.25846  | -2.06133 |
| C | -3.26525 | -0.56669 | 1.21974  |
| H | -1.84914 | 0.68597  | 2.23610  |
| C | -3.66194 | -1.11976 | -0.03134 |
| H | -3.27816 | -1.20955 | -2.16786 |
| H | -3.85913 | -0.77200 | 2.10392  |
| C | -4.80506 | -1.95712 | -0.10339 |
| N | -5.74064 | -2.65124 | -0.16356 |

R<sub>1</sub> = CH<sub>3</sub>, R<sub>2</sub> = NO<sub>2</sub> (radical cation)

E = -1424.049290

$\langle S^2 \rangle = 0.760$

|   |          |          |          |
|---|----------|----------|----------|
| C | 2.73941  | -2.09339 | -0.45121 |
| C | 3.88042  | -2.87079 | -0.57617 |
| C | 5.11669  | -2.35600 | -0.16262 |
| C | 5.21976  | -1.05020 | 0.36888  |
| C | 4.09169  | -0.25764 | 0.48953  |
| C | 2.85415  | -0.76171 | 0.03055  |
| H | 1.76502  | -2.48003 | -0.72948 |
| H | 3.81278  | -3.87908 | -0.97075 |
| H | 6.00784  | -2.97241 | -0.23478 |
| H | 6.18683  | -0.67012 | 0.68222  |
| H | 4.15629  | 0.74077  | 0.91020  |
| C | 1.60276  | 0.03256  | 0.19227  |
| O | 0.83123  | -0.56527 | 0.97973  |
| N | 1.36460  | 1.21276  | -0.37634 |
| C | 2.25793  | 1.86580  | -1.35174 |
| H | 1.64533  | 2.31771  | -2.13232 |
| H | 2.85345  | 2.64412  | -0.86842 |
| H | 2.91210  | 1.11262  | -1.79347 |
| S | -0.04661 | 2.20035  | 0.22164  |
| O | -0.17173 | 3.21524  | -0.81114 |
| O | 0.24611  | 2.49151  | 1.61396  |
| C | -1.40318 | 1.04108  | 0.11290  |
| C | -2.07328 | 0.90135  | -1.10396 |
| C | -1.78167 | 0.34234  | 1.27122  |
| C | -3.14363 | 0.01200  | -1.17321 |
| H | -1.78188 | 1.48537  | -1.97001 |
| C | -2.85439 | -0.54858 | 1.19341  |
| H | -1.26812 | 0.51429  | 2.20944  |
| C | -3.50486 | -0.69837 | -0.02463 |
| H | -3.70375 | -0.13339 | -2.08910 |
| H | -3.18990 | -1.10891 | 2.05753  |
| N | -4.64018 | -1.65277 | -0.11220 |
| O | -4.94726 | -2.24551 | 0.91496  |
| O | -5.17485 | -1.77688 | -1.20862 |

Smiles transition structure for R<sub>1</sub> = CH<sub>3</sub>, R<sub>2</sub> = NO<sub>2</sub> (radical cation)

E = -1424.041094

$\langle S^2 \rangle = 0.777$

|   |          |          |          |
|---|----------|----------|----------|
| C | 2.51333  | -2.16544 | -0.22006 |
| C | 3.59612  | -3.03562 | -0.19750 |
| C | 4.86998  | -2.55813 | 0.12752  |
| C | 5.06675  | -1.20606 | 0.43117  |
| C | 3.99626  | -0.32044 | 0.39447  |
| C | 2.71330  | -0.79655 | 0.05535  |
| H | 1.51978  | -2.52704 | -0.46109 |
| H | 3.44919  | -4.08601 | -0.42697 |
| H | 5.71242  | -3.24277 | 0.15227  |
| H | 6.05387  | -0.84604 | 0.70257  |
| H | 4.14870  | 0.71860  | 0.66555  |
| C | 1.54372  | 0.08096  | 0.06237  |
| O | 0.42949  | -0.42356 | 0.47599  |
| N | 1.54056  | 1.36280  | -0.32769 |
| C | 2.58207  | 2.12067  | -1.04282 |
| H | 2.08296  | 2.76945  | -1.76594 |
| H | 3.16508  | 2.72782  | -0.34650 |
| H | 3.22810  | 1.41766  | -1.56917 |
| S | 0.03818  | 2.20584  | 0.07907  |
| O | -0.28465 | 3.02915  | -1.07328 |
| O | 0.16048  | 2.72823  | 1.42837  |
| C | -1.01085 | 0.69597  | 0.11851  |
| C | -1.50820 | 0.22834  | -1.15418 |
| C | -1.82498 | 0.54795  | 1.30250  |
| C | -2.67960 | -0.48753 | -1.20057 |
| H | -0.94699 | 0.43705  | -2.05852 |
| C | -2.99819 | -0.16358 | 1.23123  |
| H | -1.47987 | 0.98457  | 2.23286  |
| C | -3.40460 | -0.68672 | -0.01009 |
| H | -3.07028 | -0.88229 | -2.13093 |
| H | -3.62511 | -0.31574 | 2.10183  |
| N | -4.66636 | -1.45893 | -0.07462 |
| O | -5.32827 | -1.52012 | 0.95497  |
| O | -4.93942 | -1.97603 | -1.15258 |



## B3LYP/6-31G(d) structures and electronic energies for species in Table 1

Molecule in row 1 (Sulfabenzamide)

This is **1a**.

See p. S3 for the radical cation.

See p. S4 for the Smiles transition structure.

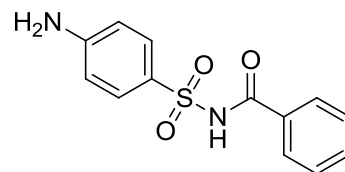

Molecule in row 2 (N-methyl sulfabenzamide)

This is **1b**.

See p. S12 for the radical cation.

See p. S13 for the Smiles transition structure.

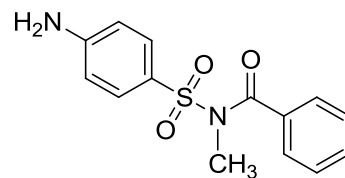

Molecule in row 3 (Sulfacetamide; Cetazin)

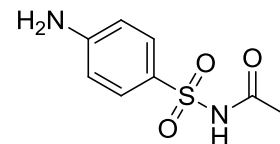

Radical cation

Energy = -1043.902564

$\langle S^2 \rangle = 0.767$

|   |          |          |          |
|---|----------|----------|----------|
| C | 2.00276  | 1.40321  | -0.05640 |
| N | 2.14948  | 0.15526  | 0.53433  |
| S | 1.23693  | -1.19157 | -0.01338 |
| O | 1.36470  | -2.17390 | 1.05479  |
| O | 1.54544  | -1.49256 | -1.40225 |
| C | -0.43102 | -0.49570 | 0.01618  |
| C | -1.02622 | -0.17717 | 1.25771  |
| C | -1.15466 | -0.42616 | -1.19858 |
| C | -2.33113 | 0.24762  | 1.28808  |
| H | -0.45718 | -0.27805 | 2.17583  |
| C | -2.46076 | -0.01053 | -1.18160 |
| H | -0.65817 | -0.69336 | -2.12470 |
| C | -3.07626 | 0.34236  | 0.06368  |
| H | -2.81307 | 0.49926  | 2.22826  |
| H | -3.03446 | 0.05797  | -2.10106 |
| N | -4.34818 | 0.75304  | 0.09028  |
| H | -4.90092 | 0.82659  | -0.75764 |
| H | -4.81000 | 1.00534  | 0.95781  |
| O | 1.00210  | 1.64237  | -0.72086 |
| C | 3.11368  | 2.39420  | 0.18569  |
| H | 3.49496  | 2.33537  | 1.21009  |
| H | 3.94127  | 2.17788  | -0.50067 |
| H | 2.74372  | 3.39995  | -0.01685 |
| H | 2.97768  | -0.09820 | 1.06878  |

Smiles transition structure (radical cation)

Energy = -1043.875562

$\langle S^2 \rangle = 0.758$

|   |          |          |          |
|---|----------|----------|----------|
| C | 2.15463  | 1.12495  | -0.00008 |
| O | 0.88649  | 1.41260  | -0.00025 |
| N | 2.51066  | -0.13630 | 0.00013  |
| S | 1.08805  | -1.27805 | 0.00006  |
| O | 1.11802  | -1.97008 | 1.27901  |
| O | 1.11819  | -1.97011 | -1.27888 |
| C | -0.17980 | 0.25892  | -0.00008 |
| C | -0.93434 | 0.29049  | 1.24109  |
| C | -0.93443 | 0.29018  | -1.24120 |
| C | -2.30018 | 0.29358  | 1.22568  |
| H | -0.39215 | 0.27972  | 2.18002  |
| C | -2.30027 | 0.29327  | -1.22569 |
| H | -0.39231 | 0.27920  | -2.18017 |
| C | -3.03040 | 0.29075  | 0.00002  |
| H | -2.84131 | 0.29830  | 2.16781  |
| H | -2.84147 | 0.29774  | -2.16778 |
| N | -4.38291 | 0.28760  | 0.00007  |
| H | -4.91178 | 0.27308  | -0.86118 |
| H | -4.91172 | 0.27330  | 0.86137  |
| H | 3.47994  | -0.44723 | 0.00034  |
| C | 3.11196  | 2.26724  | -0.00003 |
| H | 2.92694  | 2.88745  | -0.88358 |
| H | 2.92747  | 2.88689  | 0.88403  |
| H | 4.14877  | 1.92562  | -0.00042 |

Molecule in row 4 (Tolbutamide)

Radical cation

Energy = -1201.141642

$\langle S^2 \rangle = 0.759$

|   |          |          |          |
|---|----------|----------|----------|
| C | -1.06225 | 0.20947  | -0.09446 |
| O | -0.19598 | -0.52796 | -0.64202 |
| N | -0.63265 | 1.37560  | 0.51074  |
| S | 0.88934  | 2.01729  | 0.01434  |
| O | 1.30647  | 2.87014  | 1.11587  |
| O | 0.82576  | 2.48738  | -1.36021 |
| C | 1.81401  | 0.46154  | 0.01596  |
| C | 2.02813  | -0.21938 | 1.24639  |
| C | 2.54991  | 0.12429  | -1.15269 |
| C | 2.92413  | -1.26143 | 1.28022  |
| H | 1.49449  | 0.09272  | 2.13795  |
| C | 3.44282  | -0.91897 | -1.09458 |
| H | 2.38275  | 0.68804  | -2.06376 |
| C | 3.64931  | -1.64094 | 0.11501  |
| H | 3.09931  | -1.79624 | 2.20864  |
| H | 4.00846  | -1.19727 | -1.97864 |
| H | -1.26298 | 2.03672  | 0.95749  |
| N | -2.35486 | -0.11570 | -0.03614 |
| H | -3.02448 | 0.58497  | 0.25865  |
| C | -2.88789 | -1.37937 | -0.58537 |
| H | -3.15089 | -1.22760 | -1.63975 |
| H | -2.06152 | -2.09397 | -0.55563 |
| C | 4.60065  | -2.79013 | 0.15340  |
| H | 4.96780  | -2.98740 | 1.16403  |
| H | 4.08650  | -3.70206 | -0.19061 |
| H | 5.44901  | -2.63577 | -0.52077 |
| C | -4.09114 | -1.89752 | 0.21221  |
| H | -3.85468 | -1.85430 | 1.28405  |
| H | -4.18926 | -2.96173 | -0.03442 |
| C | -5.44297 | -1.21647 | -0.06899 |
| H | -5.69513 | -1.34347 | -1.13007 |
| H | -6.20816 | -1.76695 | 0.49064  |
| C | -5.54137 | 0.27030  | 0.30105  |
| H | -4.95233 | 0.90917  | -0.37233 |
| H | -6.57424 | 0.62249  | 0.21899  |
| H | -5.22162 | 0.45183  | 1.33603  |

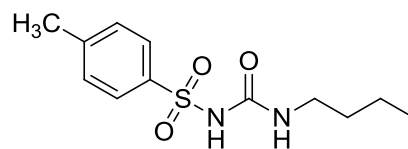

Smiles transition structure (radical cation)

Energy = -1201.134947

$\langle S^2 \rangle = 0.771$

|   |          |          |          |
|---|----------|----------|----------|
| C | 1.09296  | 0.38774  | 0.05425  |
| O | 0.13079  | -0.39505 | 0.44480  |
| N | 0.71803  | 1.58646  | -0.45779 |
| S | -0.93873 | 1.99641  | -0.03480 |
| O | -1.52777 | 2.64140  | -1.19313 |
| O | -0.95281 | 2.59119  | 1.29214  |
| C | -1.41420 | 0.18899  | 0.08023  |
| C | -1.81053 | -0.39485 | -1.19463 |
| C | -2.23508 | -0.10730 | 1.24636  |
| C | -2.85742 | -1.27590 | -1.24779 |
| H | -1.26198 | -0.12062 | -2.08949 |
| C | -3.27448 | -0.98873 | 1.14187  |
| H | -1.99065 | 0.38097  | 2.18295  |
| C | -3.61816 | -1.61083 | -0.09440 |
| H | -3.12840 | -1.71690 | -2.20267 |
| H | -3.86843 | -1.21063 | 2.02423  |
| H | 1.37093  | 2.33398  | -0.67577 |
| N | 2.35068  | -0.00325 | 0.13149  |
| H | 3.07505  | 0.65815  | -0.12537 |
| C | 2.79394  | -1.33533 | 0.61137  |
| H | 3.07587  | -1.24184 | 1.66671  |
| H | 1.92259  | -1.98988 | 0.55538  |
| C | -4.77653 | -2.55563 | -0.17141 |
| H | -4.73735 | -3.29739 | 0.63526  |
| H | -5.72335 | -2.01011 | -0.04793 |
| H | -4.81529 | -3.08038 | -1.12897 |
| C | 3.95303  | -1.89463 | -0.22369 |
| H | 3.99877  | -2.96726 | -0.00003 |
| H | 3.69609  | -1.81660 | -1.28867 |
| C | 5.34442  | -1.29002 | 0.04112  |
| H | 6.06560  | -1.87074 | -0.54538 |
| H | 5.61277  | -1.45080 | 1.09351  |
| C | 5.51854  | 0.19577  | -0.30680 |
| H | 5.17260  | 0.41764  | -1.32519 |
| H | 4.99987  | 0.85847  | 0.40162  |
| H | 6.57340  | 0.48276  | -0.25868 |

Molecule in row 5 (O-ethyl-tosylcarbamate)

Radical cation

Energy = -1142.373203

$\langle S^2 \rangle = 0.759$

|   |          |          |          |
|---|----------|----------|----------|
| C | 1.74110  | -0.13079 | -0.03478 |
| O | 0.85455  | -0.80569 | 0.51408  |
| N | 1.44921  | 1.09854  | -0.58094 |
| S | 0.06126  | 1.93081  | 0.00924  |
| O | -0.29407 | 2.87744  | -1.03444 |
| O | 0.25047  | 2.32065  | 1.39724  |
| C | -1.09237 | 0.53066  | -0.00194 |
| C | -1.47316 | -0.04829 | -1.24308 |
| C | -1.77893 | 0.22216  | 1.20772  |
| C | -2.49692 | -0.96147 | -1.25517 |
| H | -0.96467 | 0.24217  | -2.15647 |
| C | -2.80198 | -0.69504 | 1.17461  |
| H | -1.47188 | 0.70950  | 2.12676  |
| C | -3.18656 | -1.31239 | -0.04851 |
| H | -2.80855 | -1.41880 | -2.18961 |
| H | -3.33217 | -0.95208 | 2.08615  |
| H | 2.19513  | 1.67870  | -0.96112 |
| C | 3.38329  | -1.83908 | 0.28516  |
| H | 3.22642  | -1.85022 | 1.36602  |
| H | 2.71406  | -2.56577 | -0.18177 |
| C | -4.28630 | -2.31487 | -0.09136 |
| H | -4.98629 | -2.09446 | -0.90774 |
| H | -3.87177 | -3.31155 | -0.31187 |
| H | -4.83505 | -2.37530 | 0.85044  |
| C | 4.83143  | -2.03578 | -0.10119 |
| H | 5.47035  | -1.27817 | 0.36127  |
| H | 5.15951  | -3.01994 | 0.24892  |
| H | 4.96152  | -1.99739 | -1.18648 |
| O | 2.98668  | -0.49742 | -0.19868 |

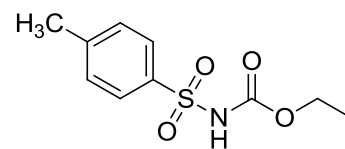

Smiles transition structure (radical cation)

Energy = -1142.361413

$\langle S^2 \rangle = 0.773$

|   |          |          |          |
|---|----------|----------|----------|
| C | 1.82943  | 0.12343  | -0.10359 |
| O | 0.81299  | -0.62702 | 0.20597  |
| N | 1.59998  | 1.39802  | -0.39678 |
| S | -0.06985 | 1.88864  | 0.01545  |
| O | -0.61093 | 2.58759  | -1.13376 |
| O | -0.04337 | 2.45289  | 1.35393  |
| C | -0.61533 | 0.03511  | 0.06719  |
| C | -1.21490 | -0.37967 | -1.20262 |
| C | -1.37262 | -0.24516 | 1.28752  |
| C | -2.44019 | -0.98671 | -1.21889 |
| H | -0.67704 | -0.17450 | -2.12244 |
| C | -2.59552 | -0.85132 | 1.21304  |
| H | -0.94592 | 0.06297  | 2.23554  |
| C | -3.17635 | -1.24396 | -0.02757 |
| H | -2.86738 | -1.27894 | -2.17397 |
| H | -3.14374 | -1.03870 | 2.13209  |
| H | 2.35106  | 2.06318  | -0.56783 |
| C | 3.27131  | -1.79856 | 0.14570  |
| H | 2.90425  | -1.98445 | 1.15674  |
| H | 2.67652  | -2.36424 | -0.57403 |
| C | -4.53305 | -1.87461 | -0.07641 |
| H | -4.72217 | -2.49376 | 0.80625  |
| H | -5.31302 | -1.09836 | -0.09539 |
| H | -4.66479 | -2.48666 | -0.97327 |
| C | 4.75708  | -2.02054 | -0.00023 |
| H | 4.96983  | -3.07499 | 0.20479  |
| H | 5.09595  | -1.79429 | -1.01485 |
| H | 5.32163  | -1.41323 | 0.71241  |
| O | 3.02548  | -0.34801 | -0.13872 |



Molecule in row 6 (N-phenylsulfonyl-N'-methylthiourea)

Radical cation

Energy = -1366.850831

$\langle S^2 \rangle = 0.756$

|   |          |          |          |
|---|----------|----------|----------|
| C | 1.89726  | -0.13170 | -0.22135 |
| N | 1.22950  | 1.00495  | -0.52079 |
| S | -0.23013 | 1.64840  | 0.26873  |
| O | -0.52514 | 2.77922  | -0.59315 |
| O | 0.04721  | 1.75693  | 1.68940  |
| C | -1.37858 | 0.30632  | 0.00164  |
| C | -2.01547 | 0.17955  | -1.22869 |
| C | -1.61893 | -0.58458 | 1.07163  |
| C | -2.90267 | -0.88659 | -1.40532 |
| H | -1.83565 | 0.89604  | -2.02329 |
| C | -2.50402 | -1.65428 | 0.86540  |
| H | -1.19539 | -0.38427 | 2.04989  |
| C | -3.13707 | -1.80212 | -0.36537 |
| H | -3.41691 | -1.00255 | -2.35425 |
| H | -2.71127 | -2.34177 | 1.67904  |
| H | 1.67540  | 1.72041  | -1.09389 |
| H | -3.83301 | -2.62064 | -0.52063 |
| N | 3.15643  | -0.26911 | -0.62851 |
| H | 3.61791  | 0.54699  | -1.01698 |
| C | 3.97231  | -1.47984 | -0.46538 |
| H | 4.87110  | -1.36235 | -1.07123 |
| H | 4.25789  | -1.61889 | 0.58167  |
| H | 3.41857  | -2.35446 | -0.81808 |
| S | 1.12990  | -1.43585 | 0.62799  |

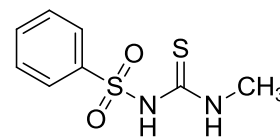

Smiles transition structure (radical cation)

Energy = -1366.834315

$\langle S^2 \rangle = 0.781$

|   |          |          |          |
|---|----------|----------|----------|
| C | 1.97733  | 0.00755  | -0.17922 |
| N | 1.43658  | 1.16772  | -0.54860 |
| S | -0.22257 | 1.55263  | 0.06137  |
| O | -0.83879 | 2.30939  | -1.01645 |
| O | -0.07518 | 2.07348  | 1.41284  |
| C | -0.76558 | -0.40091 | 0.11207  |
| C | -1.26920 | -0.77047 | -1.21488 |
| C | -1.69751 | -0.54951 | 1.23886  |
| C | -2.58402 | -1.12579 | -1.38578 |
| H | -0.58959 | -0.73086 | -2.05979 |
| C | -3.00368 | -0.90739 | 1.01412  |
| H | -1.33676 | -0.32444 | 2.23668  |
| C | -3.47151 | -1.19194 | -0.28854 |
| H | -2.93967 | -1.37451 | -2.38093 |
| H | -3.68294 | -0.98151 | 1.85780  |
| H | 1.96699  | 1.91872  | -0.98689 |
| H | -4.50686 | -1.47533 | -0.44388 |
| N | 3.26223  | -0.27499 | -0.33549 |
| H | 3.87020  | 0.47404  | -0.65111 |
| C | 3.90018  | -1.55933 | -0.00401 |
| H | 4.89589  | -1.56039 | -0.44740 |
| H | 3.98825  | -1.68157 | 1.07967  |
| H | 3.32407  | -2.38567 | -0.42776 |
| S | 0.90473  | -1.19038 | 0.53146  |

Molecule in row 7 (Sulfaguanidine)

Radical cation

Energy = -1040.061860

$\langle S^2 \rangle = 0.764$

|   |          |          |          |
|---|----------|----------|----------|
| C | -2.13336 | 1.36400  | 0.08748  |
| N | -2.21977 | 0.10470  | -0.51222 |
| S | -1.21516 | -1.16383 | -0.02590 |
| O | -1.26674 | -2.10493 | -1.13869 |
| O | -1.50795 | -1.54598 | 1.34559  |
| C | 0.42446  | -0.39684 | -0.00635 |
| C | 0.99638  | 0.05758  | -1.22085 |
| C | 1.20166  | -0.50689 | 1.17456  |
| C | 2.31337  | 0.43418  | -1.25073 |
| H | 0.39463  | 0.09609  | -2.12247 |
| C | 2.52107  | -0.13904 | 1.15470  |
| H | 0.73247  | -0.88094 | 2.07766  |
| C | 3.10761  | 0.34276  | -0.06002 |
| H | 2.77027  | 0.78500  | -2.17146 |
| H | 3.13209  | -0.21511 | 2.04938  |
| N | 4.39759  | 0.69893  | -0.08824 |
| H | 4.98468  | 0.63306  | 0.73568  |
| H | 4.83971  | 1.03214  | -0.93747 |
| N | -1.03482 | 1.64890  | 0.69088  |
| H | -1.04703 | 2.49938  | 1.25056  |
| N | -3.23389 | 2.15013  | -0.11641 |
| H | -3.22861 | 3.07563  | 0.29241  |
| H | -4.14300 | 1.70384  | -0.14041 |
| H | -2.74612 | -0.05373 | -1.36539 |

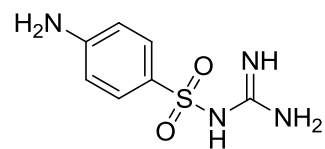

Smiles transition structure (radical cation)

Energy = -1040.057078

$\langle S^2 \rangle = 0.758$

|   |          |          |          |
|---|----------|----------|----------|
| C | 2.06719  | 1.30539  | -0.17208 |
| N | 2.44142  | 0.06659  | 0.28419  |
| S | 1.23291  | -1.17602 | 0.10516  |
| O | 1.20718  | -1.86824 | 1.38566  |
| O | 1.45265  | -1.85788 | -1.15793 |
| C | -0.25522 | -0.08349 | -0.08474 |
| C | -0.88934 | 0.32987  | 1.14194  |
| C | -1.10279 | -0.43359 | -1.19799 |
| C | -2.23950 | 0.54312  | 1.19059  |
| H | -0.28270 | 0.47899  | 2.02875  |
| C | -2.45176 | -0.22418 | -1.13575 |
| H | -0.64293 | -0.85000 | -2.08694 |
| C | -3.06150 | 0.28223  | 0.05263  |
| H | -2.70123 | 0.87850  | 2.11509  |
| H | -3.07661 | -0.47348 | -1.98889 |
| N | -4.39260 | 0.48721  | 0.10627  |
| H | -4.99325 | 0.26218  | -0.67575 |
| H | -4.84609 | 0.79908  | 0.95474  |
| N | 0.86226  | 1.35994  | -0.67183 |
| H | 0.48180  | 2.21441  | -1.06416 |
| N | 2.94064  | 2.32482  | -0.04275 |
| H | 2.69779  | 3.23807  | -0.40333 |
| H | 3.93072  | 2.12713  | 0.03588  |
| H | 3.06285  | -0.03551 | 1.08160  |

Molecule in row 8 (tosylacetone)

Radical cation

Energy = -1011.779458

$\langle S^2 \rangle = 0.758$

|   |          |          |          |
|---|----------|----------|----------|
| C | -1.98037 | 1.44975  | -0.13804 |
| S | -1.28492 | -1.20903 | 0.06794  |
| O | -1.26988 | -2.37020 | -0.81895 |
| O | -1.66440 | -1.28165 | 1.47905  |
| C | 0.37985  | -0.45738 | 0.01332  |
| C | 1.03746  | -0.28333 | -1.23554 |
| C | 1.07267  | -0.28689 | 1.24255  |
| C | 2.35479  | 0.10536  | -1.24448 |
| H | 0.50985  | -0.47834 | -2.16387 |
| C | 2.39144  | 0.10075  | 1.21582  |
| H | 0.54405  | -0.46287 | 2.17351  |
| C | 3.06610  | 0.31202  | -0.02202 |
| H | 2.87643  | 0.24382  | -2.18671 |
| H | 2.93558  | 0.24497  | 2.14421  |
| O | -0.81409 | 1.68433  | 0.15981  |
| C | -3.06446 | 2.47543  | 0.02619  |
| H | -3.66594 | 2.54518  | -0.88758 |
| H | -3.73365 | 2.14149  | 0.83118  |
| H | -2.63840 | 3.44635  | 0.28172  |
| C | 4.50395  | 0.69885  | -0.04670 |
| H | 5.12108  | -0.21137 | -0.13607 |
| H | 4.74452  | 1.32366  | -0.91264 |
| H | 4.81138  | 1.20483  | 0.87235  |
| C | -2.33365 | 0.08780  | -0.70360 |
| H | -2.15591 | 0.08500  | -1.78570 |
| H | -3.37003 | -0.21224 | -0.52176 |

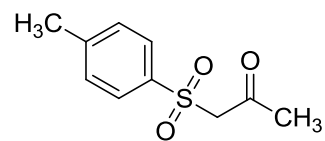

Smiles transition structure (radical cation)

Energy = -1011.755087

$\langle S^2 \rangle = 0.773$

|   |          |          |          |
|---|----------|----------|----------|
| C | 2.21174  | -1.02291 | -0.25429 |
| S | 1.02547  | 1.27635  | 0.10018  |
| O | 0.50274  | 2.35861  | -0.72497 |
| O | 1.51763  | 1.46475  | 1.46585  |
| C | -0.15504 | -0.45887 | 0.03167  |
| C | -0.87472 | -0.49757 | -1.22555 |
| C | -0.91521 | -0.54985 | 1.25907  |
| C | -2.24001 | -0.37058 | -1.21964 |
| H | -0.32788 | -0.57461 | -2.16001 |
| C | -2.28187 | -0.42527 | 1.21530  |
| H | -0.37939 | -0.63230 | 2.19856  |
| C | -2.98812 | -0.31164 | -0.01118 |
| H | -2.76821 | -0.34048 | -2.16831 |
| H | -2.83973 | -0.42736 | 2.14725  |
| O | 1.02917  | -1.40355 | 0.07803  |
| C | 3.33367  | -1.91541 | 0.10108  |
| H | 3.98068  | -2.07816 | -0.76946 |
| H | 3.95140  | -1.40464 | 0.85671  |
| H | 2.97693  | -2.86598 | 0.50045  |
| C | -4.47586 | -0.13885 | -0.03636 |
| H | -4.73376 | 0.92943  | -0.08740 |
| H | -4.92294 | -0.61741 | -0.91340 |
| H | -4.94608 | -0.54274 | 0.86471  |
| C | 2.35871  | 0.30521  | -0.85507 |
| H | 2.00826  | 0.35147  | -1.89176 |
| H | 3.35712  | 0.73716  | -0.76179 |

Molecule in row 9 (Phenylallylsulfone)

Radical cation

Energy = -897.206959

$\langle S^2 \rangle = 0.756$

|   |          |          |          |
|---|----------|----------|----------|
| C | -1.45021 | 1.95014  | -0.34710 |
| S | -1.32953 | -0.73550 | 0.21626  |
| O | -1.64854 | -1.98146 | -0.47779 |
| O | -1.74566 | -0.43302 | 1.58967  |
| C | 0.46297  | -0.47435 | 0.15420  |
| C | 1.24324  | -1.28491 | -0.64923 |
| C | 1.01216  | 0.56157  | 0.94002  |
| C | 2.62665  | -1.01668 | -0.71596 |
| H | 0.79802  | -2.08388 | -1.23326 |
| C | 2.39485  | 0.83207  | 0.83554  |
| H | 0.41248  | 1.05004  | 1.70056  |
| C | 3.19240  | 0.04027  | 0.01784  |
| H | 3.25140  | -1.61760 | -1.37002 |
| H | 2.83346  | 1.61293  | 1.44859  |
| C | -1.98641 | 0.69354  | -0.87739 |
| H | -1.65068 | 0.43474  | -1.88418 |
| H | -3.06952 | 0.58296  | -0.77774 |
| H | 4.26065  | 0.22283  | -0.04196 |
| H | -1.97411 | 2.40383  | 0.49151  |
| C | -0.29014 | 2.51851  | -0.80124 |
| H | 0.25317  | 2.10722  | -1.64764 |
| H | 0.07815  | 3.44989  | -0.38108 |

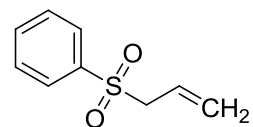

Smiles transition structure (radical cation)

Energy = -897.187967

$\langle S^2 \rangle = 0.770$

|   |          |          |          |
|---|----------|----------|----------|
| C | 1.49357  | 1.88227  | -0.29617 |
| S | 1.32532  | -0.68184 | 0.22550  |
| O | 1.49798  | -0.72792 | 1.67511  |
| O | 1.46425  | -1.84875 | -0.64021 |
| C | -0.40487 | 0.05631  | -0.07497 |
| C | -1.09303 | 0.50699  | 1.11175  |
| C | -1.17803 | -0.59474 | -1.10356 |
| C | -2.46855 | 0.45452  | 1.17962  |
| H | -0.51040 | 0.89239  | 1.94267  |
| C | -2.55259 | -0.63355 | -1.01974 |
| H | -0.65859 | -1.04555 | -1.94401 |
| C | -3.20172 | -0.10753 | 0.11618  |
| H | -2.98506 | 0.82160  | 2.06052  |
| H | -3.13404 | -1.09909 | -1.80892 |
| C | 2.40260  | 0.74752  | -0.44506 |
| H | 3.31112  | 0.76957  | 0.15787  |
| H | 2.61246  | 0.45881  | -1.47959 |
| C | 0.23835  | 1.75999  | -0.93707 |
| H | 0.23534  | 1.36468  | -1.95063 |
| H | -0.54249 | 2.48950  | -0.74099 |
| H | 1.63886  | 2.60170  | 0.50589  |
| H | -4.28454 | -0.16147 | 0.18409  |



Molecule in row 10 (*p*-Aminophenylallylsulfone)

Radical cation

Energy = -952.602290

$\langle S^2 \rangle = 0.770$

|   |          |          |          |
|---|----------|----------|----------|
| C | -2.21647 | 1.81452  | -0.12851 |
| S | -1.56984 | -0.85116 | 0.19906  |
| O | -1.67695 | -2.11164 | -0.54347 |
| O | -1.87354 | -0.74170 | 1.63029  |
| C | 0.20592  | -0.38916 | 0.07320  |
| C | 0.97467  | -0.92449 | -0.98401 |
| C | 0.80024  | 0.34776  | 1.12452  |
| C | 2.32372  | -0.66566 | -1.03943 |
| H | 0.49356  | -1.54440 | -1.73363 |
| C | 2.14715  | 0.61560  | 1.08782  |
| H | 0.18469  | 0.68129  | 1.95282  |
| C | 2.93702  | 0.11419  | -0.00005 |
| H | 2.93502  | -1.05268 | -1.84973 |
| H | 2.62476  | 1.19222  | 1.87475  |
| C | -2.47702 | 0.45852  | -0.70548 |
| H | -2.18285 | 0.36661  | -1.75524 |
| H | -3.52227 | 0.14106  | -0.60277 |
| H | -2.61523 | 1.99664  | 0.86689  |
| C | -1.55059 | 2.77341  | -0.78019 |
| H | -1.16332 | 2.62626  | -1.78625 |
| H | -1.40520 | 3.75638  | -0.34213 |
| N | 4.25025  | 0.35944  | -0.04111 |
| H | 4.71584  | 0.89401  | 0.68599  |
| H | 4.83685  | 0.00372  | -0.78974 |

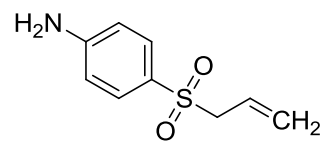

Smiles transition structure (radical cation)

Energy = -952.578818

$\langle S^2 \rangle = 0.774$

|   |          |          |          |
|---|----------|----------|----------|
| C | 1.97661  | 1.84554  | -0.26368 |
| S | 1.64286  | -0.70906 | 0.23724  |
| O | 1.78732  | -0.74679 | 1.69336  |
| O | 1.73504  | -1.90497 | -0.59987 |
| C | -0.03289 | 0.10162  | -0.09925 |
| C | -0.74890 | 0.53281  | 1.08063  |
| C | -0.80877 | -0.52182 | -1.14664 |
| C | -2.11061 | 0.50148  | 1.13683  |
| H | -0.17975 | 0.89265  | 1.93164  |
| C | -2.17089 | -0.55233 | -1.10038 |
| H | -0.28624 | -0.96892 | -1.98676 |
| C | -2.86481 | -0.03428 | 0.04251  |
| H | -2.63373 | 0.85569  | 2.02036  |
| H | -2.73982 | -1.00326 | -1.90834 |
| C | 2.80266  | 0.64431  | -0.42679 |
| H | 3.71282  | 0.59441  | 0.17226  |
| H | 2.99325  | 0.35441  | -1.46436 |
| C | 0.73472  | 1.82082  | -0.91718 |
| H | 0.70340  | 1.42946  | -1.93171 |
| H | -0.00612 | 2.58887  | -0.71175 |
| H | 2.15233  | 2.51346  | 0.57518  |
| N | -4.19822 | -0.07322 | 0.09593  |
| H | -4.70716 | 0.25949  | 0.90611  |
| H | -4.74870 | -0.47354 | -0.65424 |

Molecule in row 11 (Phenylpropargylsulfone)

Radical cation

Energy = -895.940752

$\langle S^2 \rangle = 0.758$

|   |          |          |          |
|---|----------|----------|----------|
| S | -1.39012 | -0.62894 | 0.23452  |
| O | -1.77509 | -1.88064 | -0.41054 |
| O | -1.73076 | -0.27657 | 1.61629  |
| C | 0.41390  | -0.44967 | 0.13091  |
| C | 1.14837  | -1.31730 | -0.64885 |
| C | 1.02323  | 0.57577  | 0.89991  |
| C | 2.54320  | -1.10750 | -0.73445 |
| H | 0.66426  | -2.11016 | -1.20998 |
| C | 2.41627  | 0.78891  | 0.77579  |
| H | 0.44670  | 1.10316  | 1.65268  |
| C | 3.16722  | -0.05650 | -0.02531 |
| H | 3.13562  | -1.74344 | -1.38583 |
| H | 2.89315  | 1.56459  | 1.36624  |
| C | -2.01733 | 0.78637  | -0.86674 |
| H | -2.05853 | 0.37833  | -1.88123 |
| H | -3.02595 | 0.98323  | -0.48693 |
| H | 4.24283  | 0.06993  | -0.09756 |
| C | -1.12646 | 1.90176  | -0.73699 |
| C | -0.29677 | 2.78611  | -0.60022 |
| H | 0.36075  | 3.62739  | -0.51992 |

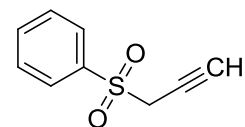

Smiles transition structure (radical cation)

Energy = -895.925599

$\langle S^2 \rangle = 0.768$

|   |          |          |          |
|---|----------|----------|----------|
| S | 1.39628  | -0.61083 | 0.00005  |
| O | 1.61982  | -1.25793 | 1.28929  |
| O | 1.61985  | -1.25814 | -1.28908 |
| C | -0.38131 | -0.00485 | 0.00000  |
| C | -1.09478 | -0.11610 | 1.24411  |
| C | -1.09477 | -0.11635 | -1.24409 |
| C | -2.47361 | -0.15285 | 1.23043  |
| H | -0.53485 | -0.15320 | 2.17290  |
| C | -2.47359 | -0.15310 | -1.23042 |
| H | -0.53482 | -0.15362 | -2.17287 |
| C | -3.16395 | -0.16821 | 0.00001  |
| H | -3.02678 | -0.20164 | 2.16274  |
| H | -3.02676 | -0.20208 | -2.16272 |
| C | 2.38423  | 1.06751  | -0.00009 |
| H | 2.99322  | 1.06553  | 0.90784  |
| H | 2.99317  | 1.06540  | -0.90805 |
| H | -4.24901 | -0.22043 | 0.00001  |
| C | 1.27522  | 1.96065  | -0.00014 |
| C | 0.02640  | 2.03556  | -0.00017 |
| H | -0.89504 | 2.58827  | -0.00023 |

Molecule in row 12 (Phenylcyanomethylsulfone)

Radical cation

Energy = -912.019885

$\langle S^2 \rangle = 0.761$

|   |          |          |          |
|---|----------|----------|----------|
| S | -1.37411 | -0.63468 | 0.24294  |
| O | -1.71251 | -1.91734 | -0.36131 |
| O | -1.66576 | -0.27050 | 1.63287  |
| C | 0.43314  | -0.40321 | 0.10588  |
| C | 1.18354  | -1.29860 | -0.61439 |
| C | 1.04532  | 0.65782  | 0.84318  |
| C | 2.58615  | -1.07293 | -0.70033 |
| H | 0.71762  | -2.12553 | -1.14166 |
| C | 2.44084  | 0.89612  | 0.71186  |
| H | 0.46024  | 1.22370  | 1.56102  |
| C | 3.20448  | 0.02156  | -0.03293 |
| H | 3.18686  | -1.72239 | -1.33152 |
| H | 2.89162  | 1.72379  | 1.24926  |
| C | -2.08252 | 0.71429  | -0.85048 |
| H | -2.13259 | 0.31947  | -1.86955 |
| H | -3.09008 | 0.89730  | -0.46106 |
| H | 4.27913  | 0.15241  | -0.11124 |
| C | -1.21821 | 1.87083  | -0.74701 |
| N | -0.40822 | 2.69623  | -0.60708 |

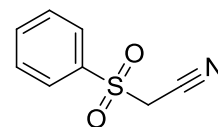

Smiles transition structure (radical cation)

Energy = -911.986195

$\langle S^2 \rangle = 0.774$

|   |          |          |          |
|---|----------|----------|----------|
| S | 1.30738  | -0.69546 | 0.00007  |
| O | 1.43374  | -1.37048 | 1.28327  |
| O | 1.43378  | -1.37068 | -1.28302 |
| C | -0.41578 | 0.35210  | -0.00005 |
| C | -1.13693 | 0.18062  | 1.24899  |
| C | -1.13694 | 0.18030  | -1.24904 |
| C | -2.48114 | -0.09347 | 1.23267  |
| H | -0.59264 | 0.26969  | 2.18348  |
| C | -2.48115 | -0.09378 | -1.23264 |
| H | -0.59265 | 0.26913  | -2.18355 |
| C | -3.16425 | -0.22520 | 0.00004  |
| H | -3.02147 | -0.21840 | 2.16542  |
| H | -3.02149 | -0.21895 | -2.16535 |
| C | 2.53960  | 0.89789  | -0.00004 |
| H | 3.13684  | 0.84249  | 0.91326  |
| H | 3.13692  | 0.84228  | -0.91328 |
| H | -4.22871 | -0.44031 | 0.00007  |
| C | 1.48545  | 1.84652  | -0.00019 |
| N | 0.29597  | 1.92012  | -0.00023 |

Molecule in row 13 (*E*-1-tosyl-2-(*p*-tolylthio)propene)

Radical cation

Energy = -1605.131280

$\langle S^2 \rangle = 0.760$

|   |          |          |          |
|---|----------|----------|----------|
| C | -0.64333 | 1.96257  | -0.45804 |
| S | 1.40793  | 0.93889  | 1.20438  |
| O | 0.82368  | 0.20716  | 2.34064  |
| O | 1.90683  | 2.31034  | 1.34055  |
| C | 2.65575  | -0.06721 | 0.43539  |
| C | 2.64455  | -1.45115 | 0.64402  |
| C | 3.64136  | 0.54551  | -0.34921 |
| C | 3.63191  | -2.22656 | 0.04474  |
| H | 1.89373  | -1.90185 | 1.28476  |
| C | 4.61688  | -0.24992 | -0.93841 |
| H | 3.65036  | 1.62321  | -0.47355 |
| C | 4.63118  | -1.64366 | -0.75265 |
| H | 3.63733  | -3.30080 | 0.20678  |
| H | 5.38879  | 0.21595  | -1.54478 |
| C | 0.04169  | 0.90032  | 0.02221  |
| H | -0.26633 | -0.12097 | -0.18026 |
| S | -2.10567 | 1.66305  | -1.43515 |
| C | -2.97964 | 0.33853  | -0.71568 |
| C | -3.91959 | -0.30299 | -1.56743 |
| C | -2.88567 | -0.04654 | 0.64785  |
| C | -4.71244 | -1.31698 | -1.07120 |
| H | -4.00255 | -0.00277 | -2.60790 |
| C | -3.69357 | -1.06254 | 1.12123  |
| H | -2.20661 | 0.46160  | 1.32267  |
| C | -4.61828 | -1.72522 | 0.28145  |
| H | -5.42208 | -1.81087 | -1.72838 |
| H | -3.63161 | -1.34275 | 2.16857  |
| C | 5.71804  | -2.48663 | -1.36766 |
| H | 6.62027  | -2.46420 | -0.74235 |
| H | 5.41236  | -3.53228 | -1.46457 |
| H | 6.00218  | -2.11497 | -2.35729 |
| C | -5.47478 | -2.83787 | 0.80376  |
| H | -5.02025 | -3.80830 | 0.55484  |
| H | -5.58018 | -2.79554 | 1.89095  |
| H | -6.46997 | -2.82760 | 0.34803  |
| C | -0.31322 | 3.42747  | -0.35592 |
| H | -0.97816 | 3.91236  | 0.36909  |
| H | 0.71565  | 3.57182  | -0.02925 |
| H | -0.46842 | 3.92402  | -1.32137 |

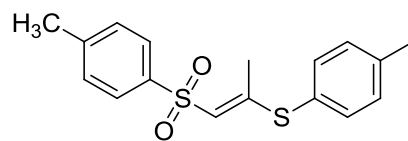

Smiles transition structure (radical cation)

Energy = -1605.087652

$\langle S^2 \rangle = 0.778$

|   |          |          |          |
|---|----------|----------|----------|
| C | -0.24799 | 2.32750  | -0.79417 |
| S | 1.46565  | 1.47554  | 1.13199  |
| O | 0.68660  | 1.12266  | 2.33152  |
| O | 2.86353  | 1.91201  | 1.20740  |
| C | 1.25381  | -0.12908 | -0.32468 |
| C | 1.01464  | -1.33765 | 0.42910  |
| C | 2.43516  | -0.08545 | -1.16277 |
| C | 1.99723  | -2.29962 | 0.50440  |
| H | 0.09914  | -1.44038 | 0.99949  |
| C | 3.38665  | -1.07142 | -1.05818 |
| H | 2.59693  | 0.76344  | -1.82060 |
| C | 3.21192  | -2.19658 | -0.21434 |
| H | 1.82707  | -3.17001 | 1.13207  |
| H | 4.29305  | -0.98970 | -1.65166 |
| C | 0.53315  | 2.70594  | 0.21321  |
| H | 0.65117  | 3.73790  | 0.53508  |
| S | -0.25305 | 0.55889  | -1.25783 |
| C | -1.75541 | -0.09765 | -0.54451 |
| C | -2.48004 | -0.96287 | -1.37458 |
| C | -2.20221 | 0.22636  | 0.74533  |
| C | -3.66989 | -1.50954 | -0.89929 |
| H | -2.12939 | -1.20017 | -2.37457 |
| C | -3.39391 | -0.33335 | 1.19059  |
| H | -1.63301 | 0.88370  | 1.39388  |
| C | -4.14705 | -1.20726 | 0.38399  |
| H | -4.23771 | -2.17703 | -1.54067 |
| H | -3.74844 | -0.08697 | 2.18767  |
| C | 4.28370  | -3.23914 | -0.08608 |
| H | 5.02360  | -2.93607 | 0.66846  |
| H | 3.87479  | -4.20362 | 0.22865  |
| H | 4.82511  | -3.37834 | -1.02733 |
| C | -5.42835 | -1.80751 | 0.90110  |
| H | -5.21897 | -2.54693 | 1.68427  |
| H | -6.07223 | -1.04154 | 1.34660  |
| H | -5.98905 | -2.30931 | 0.10842  |
| C | -1.11564 | 3.18920  | -1.66197 |
| H | -1.05380 | 4.22960  | -1.33253 |
| H | -0.80215 | 3.13380  | -2.71087 |
| H | -2.16342 | 2.87201  | -1.60718 |



Molecule in row 14 (3-phenylsulfonyl-2-(phenylthio)propene)

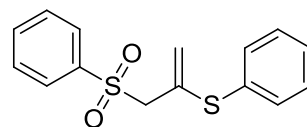

Radical cation

Energy = -1526.489481

$\langle S^2 \rangle = 0.768$

|   |          |          |          |
|---|----------|----------|----------|
| C | -0.21527 | 1.33379  | -0.61536 |
| S | 0.99162  | -1.14961 | -0.01600 |
| O | 1.03896  | -2.43526 | -0.71613 |
| O | 0.32797  | -0.99660 | 1.29253  |
| C | 2.63674  | -0.46092 | 0.10122  |
| C | 3.57343  | -0.78565 | -0.88518 |
| C | 2.95181  | 0.36776  | 1.18387  |
| C | 4.85535  | -0.24494 | -0.78910 |
| H | 3.31241  | -1.46548 | -1.69008 |
| C | 4.24124  | 0.89644  | 1.26457  |
| H | 2.21428  | 0.56041  | 1.95548  |
| C | 5.18514  | 0.59483  | 0.27986  |
| H | 5.59992  | -0.49057 | -1.53990 |
| H | 4.51089  | 1.53020  | 2.10379  |
| C | 0.06392  | -0.01605 | -1.18384 |
| H | 0.68392  | 0.06717  | -2.08046 |
| H | -0.83550 | -0.58492 | -1.43080 |
| H | 6.18808  | 1.00486  | 0.35159  |
| C | 0.71908  | 2.33087  | -0.62708 |
| H | 1.68286  | 2.17267  | -1.10044 |
| H | 0.53647  | 3.30843  | -0.18984 |
| S | -1.74059 | 1.84977  | 0.08286  |
| C | -2.95216 | 0.58337  | 0.08602  |
| C | -4.25872 | 1.04425  | -0.21668 |
| C | -2.72643 | -0.75818 | 0.47182  |
| C | -5.31479 | 0.14635  | -0.19722 |
| H | -4.42548 | 2.08224  | -0.48827 |
| C | -3.80240 | -1.63521 | 0.49249  |
| H | -1.74721 | -1.07888 | 0.81086  |
| C | -5.08911 | -1.19403 | 0.15014  |
| H | -6.31406 | 0.48451  | -0.45138 |
| H | -3.64392 | -2.66371 | 0.80070  |
| H | -5.92152 | -1.89070 | 0.17467  |

Smiles transition structure, C-attack (radical cation)

Energy = -1526.460836

$\langle S^2 \rangle = 0.767$

|   |          |          |          |
|---|----------|----------|----------|
| C | 0.14676  | -0.73028 | -1.04268 |
| S | -1.01345 | 1.46120  | -0.17120 |
| O | -1.65498 | 2.60278  | -0.81793 |
| O | -0.38351 | 1.55383  | 1.15006  |
| C | -2.24727 | 0.02345  | -0.07579 |
| C | -3.48115 | 0.24070  | -0.78776 |
| C | -2.31699 | -0.62677 | 1.20733  |
| C | -4.65548 | -0.32167 | -0.33452 |
| H | -3.46889 | 0.84053  | -1.69283 |
| C | -3.50352 | -1.18100 | 1.64359  |
| H | -1.42053 | -0.68565 | 1.81550  |
| C | -4.67297 | -1.04209 | 0.87512  |
| H | -5.57414 | -0.18152 | -0.89517 |
| H | -3.53833 | -1.70374 | 2.59410  |
| C | 0.27081  | 0.70835  | -1.33969 |
| H | -0.06863 | 0.96564  | -2.34738 |
| H | 1.22930  | 1.17579  | -1.11339 |
| H | -5.60552 | -1.46765 | 1.23318  |
| C | -1.18013 | -1.22198 | -1.21780 |
| H | -1.65744 | -0.95082 | -2.15586 |
| H | -1.43643 | -2.21994 | -0.87047 |
| S | 1.26962  | -1.69123 | -0.17319 |
| C | 2.74716  | -0.70537 | 0.06752  |
| C | 3.90989  | -1.12921 | -0.59040 |
| C | 2.76587  | 0.36909  | 0.96958  |
| C | 5.10350  | -0.44689 | -0.35783 |
| H | 3.88304  | -1.97345 | -1.27239 |
| C | 3.96934  | 1.04107  | 1.18405  |
| H | 1.86542  | 0.67549  | 1.49145  |
| C | 5.13260  | 0.63573  | 0.52460  |
| H | 6.00877  | -0.76299 | -0.86668 |
| H | 3.99629  | 1.87639  | 1.87696  |
| H | 6.06580  | 1.16081  | 0.70418  |

Smiles transition structure, S-attack (radical cation)

Energy = -1526.440003

$\langle S^2 \rangle = 0.781$

|   |          |          |          |
|---|----------|----------|----------|
| C | -0.12451 | -2.02916 | -0.93440 |
| S | 1.75672  | -1.16870 | 0.78483  |
| O | 3.21236  | -1.15480 | 0.94214  |
| O | 0.82916  | -1.35577 | 1.91439  |
| C | 1.07697  | 0.59665  | -0.30496 |
| C | 2.11224  | 0.95844  | -1.24777 |
| C | 0.71087  | 1.56031  | 0.70491  |
| C | 2.86392  | 2.09539  | -1.03881 |
| H | 2.33025  | 0.30759  | -2.08980 |
| C | 1.48571  | 2.68876  | 0.87981  |
| H | -0.11139 | 1.34591  | 1.37684  |
| C | 2.57100  | 2.96645  | 0.02744  |
| H | 3.67585  | 2.32700  | -1.72121 |
| H | 1.24407  | 3.37359  | 1.68692  |
| C | 1.27643  | -2.36112 | -0.53890 |
| H | 2.01145  | -2.23906 | -1.34167 |
| H | 1.34981  | -3.37046 | -0.12460 |
| H | 3.16428  | 3.86229  | 0.17613  |
| C | -1.13065 | -2.88247 | -1.11503 |
| H | -0.96770 | -3.94780 | -0.97613 |
| H | -2.12972 | -2.56955 | -1.40082 |
| S | -0.40157 | -0.24174 | -1.22941 |
| C | -1.92121 | 0.15460  | -0.36923 |
| C | -2.78772 | 1.00998  | -1.06276 |
| C | -2.22153 | -0.34024 | 0.90823  |
| C | -3.99090 | 1.37402  | -0.45756 |
| H | -2.53526 | 1.37619  | -2.05324 |
| C | -3.42937 | 0.03733  | 1.49043  |
| H | -1.53115 | -0.99218 | 1.43322  |
| C | -4.30919 | 0.88907  | 0.81224  |
| H | -4.67725 | 2.03044  | -0.98277 |
| H | -3.68214 | -0.33369 | 2.47877  |
| H | -5.24807 | 1.17322  | 1.27756  |
